Running head: PREPARATION TIME CONSTRAINTS CAN ASSAY IMPLICIT  
VISUOMOTOR ADAPTATION

1

1  
2  
3  
4  
5  
6  
7  
8  
9  
10  
11  
12  
13  
14  
15  
16  
17  
18  
19  
20  
21  
22

Estimating the implicit component of visuomotor rotation learning by constraining movement preparation time.

Li-Ann Leow<sup>1\*</sup>, Reece Gunn<sup>1</sup>, Welber Marinovic<sup>1,2</sup>, Timothy J Carroll<sup>1</sup>

<sup>1</sup> Centre for Sensorimotor Performance, School of Human Movement and Nutrition Sciences, Building 26B, The University of Queensland, Brisbane, Queensland, 4072, Australia.

<sup>2</sup> School of Psychology and Speech Pathology, Curtin University, Bentley, Western Australia, Australia.

Corresponding author: Li-Ann Leow.

Corresponding author email: l.leow@uq.edu.au

Corresponding author address: Centre for Sensorimotor Performance, School of Human Movement and Nutrition Sciences, Building 26B, The University of Queensland, Brisbane, Queensland, 4072, Australia.

*Keywords:* implicit learning, explicit learning, compensatory strategies, motor learning, visuomotor rotation

## PREPARATION TIME CONSTRAINTS CAN ASSAY IMPLICIT VISUOMOTOR ADAPTATION

2

23

### **Abstract**

24

25

26

27

28

29

30

31

32

33

34

35

36

37

38

39

40

41

42

43

When sensory feedback is perturbed, accurate movement is restored by a combination of implicit processes and deliberate re-aiming to strategically compensate for errors. Here, we directly compare two methods used previously to dissociate implicit from explicit learning on a trial-by-trial basis: 1) asking participants to report the direction that they aim their movements, and contrasting this with the directions of the target and the movement that they actually produce, 2) manipulating movement preparation time. By instructing participants to re-aim without a sensory perturbation, we show that re-aiming is possible even with the shortest possible preparation times, particularly when targets are narrowly distributed. Nonetheless, re-aiming is effortful and comes at the cost of increased variability, so we tested whether constraining preparation time is sufficient to suppress strategic re-aiming during adaptation to visuomotor rotation with a broad target distribution. The rate and extent of error reduction under preparation time constraints were similar to estimates of implicit learning obtained from self-report without time pressure, suggesting that participants chose not to apply a re-aiming strategy to correct visual errors under time pressure. Surprisingly, participants who reported aiming directions showed less implicit learning according to an alternative measure, obtained during trials performed without visual feedback. This suggests that the process of reporting can affect the extent or persistence of implicit learning. The data extend existing evidence that restricting preparation time can suppress explicit re-aiming, and provide an estimate of implicit visuomotor rotation learning that does not require participants to report their aiming directions.

## PREPARATION TIME CONSTRAINTS CAN ASSAY IMPLICIT VISUOMOTOR ADAPTATION

3

44

45

### Introduction

46

47

48

49

50

51

52

53

54

55

56

57

58

59

60

61

62

63

64

65

When we move, perturbations to our body or the environment can elicit discrepancies between predicted and actual outcomes. We readily adapt our movements to compensate when such discrepancies are systematic, and this process is commonly termed sensorimotor adaptation. Sensorimotor adaptation was traditionally thought to occur largely via implicit mechanisms involving updating of an internal model (Wolpert et al. 1995) in order to compensate for sensory prediction errors (i.e. mismatches between predicted and observed behaviour). It has long been recognized, however, that explicit processes can influence the behavioural response to sensorimotor perturbation (e.g., Keisler and Shadmehr 2010; Mazzoni and Krakauer 2006; Redding and Wallace 1996; Uhlarik 1973). For example, if a rotation of visual feedback results in a participant noticing systematic reaching errors to one side of a target, she might deliberately aim to the opposite side of the target to compensate. One way to disentangle such strategic re-aiming from implicit learning is to require participants to report their aiming directions throughout adaptation, and then to infer implicit adaptation by subtracting verbally reported aiming directions from actual movement directions (Bond and Taylor 2015; Brudner et al. 2016; McDougle et al. 2015; Taylor et al. 2014). This method also provides a measure of explicit re-aiming, which is estimated as the difference between the reported aiming direction and the target direction. Studies using this approach suggest that explicit re-aiming dominates the rapid initial error reduction typically seen in most sensorimotor adaptation studies, but then contributes progressively less to behaviour as an implicit *remapping* between motor commands and expected sensory outcomes develops with extended exposure to perturbation.

66

67

68

69

70

71

72

73

The capacity to decompose sensorimotor adaptation into implicit and explicit components represents an important advance in the understanding of how the brain responds to systematic discrepancies between desired and actual motor behaviour (Taylor et al. 2014). In particular, the demonstration that explicit re-aiming dominates the initial error reduction phase of sensorimotor adaptation presents challenges for those interested in assessing the rate of implicit remapping. A method of disentangling explicit and implicit processes that relies upon subject reports of aiming directions may have limitations, however. Firstly, the approach requires faithful reports of intended aiming directions from study participants, which may be imprecise, difficult to obtain in

## PREPARATION TIME CONSTRAINTS CAN ASSAY IMPLICIT VISUOMOTOR ADAPTATION

4

74 some contexts, and time-consuming. Secondly, the instruction to report aiming directions results  
75 in faster error reduction than occurs in the absence of such instructions (Taylor et al. 2014),  
76 presumably because the reporting requirement alerts participants to the benefits of re-aiming to  
77 achieve task success. This raises the question of whether the reporting procedure might also  
78 impact implicit processes, because the reduced task errors that accompany explicit strategy use  
79 might affect the rate or extent of implicit adaptation via reward or reinforcement-related  
80 processes (Reichenthal et al. 2016).

81 An alternative approach to probe implicit processes in sensorimotor adaptation is to  
82 suppress the expression of explicit processes. This can be done either by employing dual-task  
83 paradigms to limit attentional resources that can be devoted to explicit re-aiming (Galea 2010;  
84 Keisler and Shadmehr 2010; Malone and Bastian ; Taylor and Thoroughman 2007; Taylor and  
85 Thoroughman 2008), or by restricting the amount of time available to prepare a movement  
86 (Fernandez-Ruiz et al. 2011; Haith et al. 2015). Restricting preparation time appears to be a  
87 particularly promising approach, as there is a relationship between preparation time and  
88 movement accuracy even without a sensorimotor perturbation (Georgopoulos and Massey 1987b;  
89 Marinovic et al. 2017). Furthermore, there is a time cost of explicitly preparing movements  
90 toward locations that are offset from the physical location of a target (Georgopoulos and Massey  
91 1987b). In one such approach, Haith et al. (2015) carefully controlled movement preparation  
92 time to dissociate learning resulting from explicit and implicit processes during adaptation to a  
93 visuomotor rotation. They showed significantly slower error reduction when they restricted  
94 movement preparation time by suddenly shifting target position in 20% of trials approximately  
95 300ms before the imperative to move (Haith et al. 2015). The data suggest that explicit re-aiming  
96 was suppressed by the preparation time constraint. The approach also has the benefit that it  
97 provides a within-subject contrast between presumed implicit remapping (from errors on the  
98 short preparation trials) and combined implicit and explicit adaptation (from errors on the long  
99 preparation trials). However, some aspects of this approach merit further consideration. First, it  
100 is unclear whether 300 ms is sufficiently brief to prevent entirely strategy use during adaptation.  
101 Second, the switch in target location might introduce an additional processing demand, and may  
102 not be desirable in some experimental designs. More generally, it is unknown whether assays of  
103 implicit sensorimotor adaptation obtained via preparation time manipulation differ from those

## PREPARATION TIME CONSTRAINTS CAN ASSAY IMPLICIT VISUOMOTOR ADAPTATION

5

104 obtained via reporting procedures. Here, we compared implicit learning assayed by restricting  
105 movement preparation time to implicit learning assayed via reporting procedures.

106         The first aim of the study was to determine the extent to which the capacity to explicitly  
107 re-aim is suppressed by reducing the amount of time available to prepare movement. We asked  
108 people to explicitly re-aim 30° clockwise or counter-clockwise to targets, under increasing time  
109 pressure, but in the absence of a perturbation. We expected that there would be a minimum time  
110 for movement preparation below which people would be unable to aim accurately to one side of  
111 a target. However, we also wondered whether advance knowledge of the approximate location of  
112 potential targets would influence the capacity to re-aim. To this end, voluntary re-aiming was  
113 performed either to a narrow (0-35° range) (Experiment 1A) or uniform 360° distribution of  
114 target directions (Experiment 1B). We predicted that people would be able to re-aim with shorter  
115 preparation times when targets were distributed narrowly. We found that participants could re-  
116 aim by 30° even at the shortest preparation times tested with a narrow target distribution, but at  
117 the expense of increased movement variability. For a broad 360° target distribution, participants  
118 could at least partially re-aim whenever movement time was sufficient to produce directionally  
119 tuned movements (i.e., as opposed to randomly directed movements), but at more dramatic cost  
120 to movement variability. Thus, the motor system is capable of systematic re-aiming to one side  
121 of a target irrespective of time constraints. However, we noted that participants found re-aiming  
122 at short preparation times extremely effortful. Given this, the purpose of Experiment 2 was to  
123 determine whether people would choose to re-aim under time pressure in order to improve  
124 performance on a visuomotor rotation task.

125         In Experiment 2, we compared adaptation to a 30° visuomotor rotation with a 360° target  
126 distribution under three alternative conditions. Separate groups of participants were either  
127 allowed: (1) a short time to prepare movement, (2) a longer time to prepare movement, but also  
128 asked to report their aiming direction, or (3) a longer time to prepare movement, without  
129 reporting aiming direction. If people chose not to re-aim reaches to counter the visuomotor  
130 rotation when preparation time was constrained, then we expected the rate of error reduction in  
131 this condition to resemble the rate of implicit adaptation estimated from the self-report procedure.  
132 We were also interested in the effects of the three different conditions on an alternative measure  
133 of implicit adaptation obtained from reaches made in the absence of visual feedback. We found

## PREPARATION TIME CONSTRAINTS CAN ASSAY IMPLICIT VISUOMOTOR ADAPTATION

6

134 that the rate and extent of error compensation with short preparation time closely matched  
135 implicit error compensation, as estimated from subtracting movement directions from self-  
136 reported aiming directions. This suggests that restriction of preparation time can suppress  
137 explicit re-aiming, and provide an estimate of implicit learning that does not require participants  
138 to report their aiming directions. Surprisingly, in the post-perturbation no-feedback trials, less  
139 implicit learning was shown in participants who reported aiming directions than participants who  
140 did not report aiming directions. This raises the possibility that the reporting procedure itself  
141 increased engagement of explicit learning, which inadvertently reduced engagement of implicit  
142 learning.

143

144

### Method

#### 145 **Participants**

146 A total of 74 participants completed this study (Experiment 1A: n=14, mean age = 19.93,  
147 range = 17-42 years, 12 females, 2 left-handed; Experiment 1B: n=14, mean age = 19.07, SD =  
148 3.53, range = 17-31 years, 11 females, 2 left-handed; Experiment 2: n=36, 30 females, 2 left  
149 handed, mean age =19.85, SD = 1.82). In Experiment 2, 36 people were initially assigned either  
150 to a short preparation time condition or a long preparation time condition in which they had to  
151 report aiming direction. Subsequently, in order to test whether differences in post-perturbation  
152 estimates of implicit learning were due to the preparation time conditions or the reporting  
153 procedure, a further 10 people were recruited to a long preparation time condition without  
154 reporting (mean age 21, SD=4.7, range=18 to 34 years, all right-handed). For all experiments,  
155 the participants were randomly assigned either to clockwise or counter-clockwise visuomotor  
156 rotation conditions in equal proportions. All participants were naïve to visuomotor rotation and  
157 force-field adaptation tasks.

#### 158 **Apparatus and General Trial Structure**

159 Participants completed the task using the vBOT planar robotic manipulandum, which has  
160 a low-mass, two-link carbon fibre arm and measures position with optical encoders sampled at  
161 1,000 Hz (Howard et al. 2009). Participants were seated on a height-adjustable chair at their ideal  
162 height for viewing the screen for the duration of the experiment. Visual feedback was presented

## PREPARATION TIME CONSTRAINTS CAN ASSAY IMPLICIT VISUOMOTOR

### ADAPTATION

7

163 on a horizontal plane on a 27" LCD computer monitor (ASUS, VG278H, set at 60Hz refresh rate)  
164 mounted above the vBOT and projected to the subject via a mirror in a darkened room,  
165 preventing direct vision of their hand. The mirror allowed the visual feedback of the target (a 0.5  
166 cm radius circle), the starting location (a 0.5 cm radius circle), and hand cursor (0.25 cm radius)  
167 to be presented in the plane of movement, with a black background. The start circle was aligned  
168 10cm to the right of the participant's mid-sagittal plane at approximately mid-sternum level.

### 169 **General Trial Structure**

170 Participants made centre-out reaching movements by moving the robot arm from the start  
171 circle to the target. Targets appeared in random order at one of eight locations 9cm away from  
172 the start circle—target locations were clustered either in a small range (Experiment 1A:  
173 17.5°,12.5°,7.5°,2.5°,-2.5°,-7.5°,-12.5°,-17.5° from straight ahead), or distributed uniformly  
174 throughout 360° (Experiment 1B & Experiment 2: 0°, 45°, 90°, 135°, 180°, 225°, 270° and 315°).  
175 At the start of each trial, the central start circle was displayed. If participants failed to move the  
176 hand to within 1cm of the start circle after 1 second, the robotic manipulandum passively moved  
177 the participant's hand to the start circle (using a simulated 2 dimensional spring with the spring  
178 constant magnitude increasing linearly over time). A trial was initiated when the cursor remained  
179 within the home location at a speed below 0.1 cm/s for 200 ms. We used a timed-response  
180 paradigm (Ghez et al. 1989; Haith et al. 2015; Marinovic et al. 2014; Marinovic et al. 2008;  
181 Schouten and Bekker 1967) to manipulate movement preparation time. Across all conditions, a  
182 sequence of three tones spaced 500 ms apart was presented at a clearly audible volume via  
183 external speakers. Participants were instructed to time the onset of their movements with the  
184 onset of the third tone (see Figure 1). They were instructed not to stop on the target, but to slice  
185 through it. Movement initiation was defined online as when hand speed exceeded 2cm/s. Targets  
186 appeared at 1000ms, 250ms, 200ms, 150ms, or 100ms, minus a display latency ( $27.6 \pm 1.8$  ms),  
187 prior to the third tone. Thus target direction information became available 972.4, 222.4, 172.4,  
188 122.4, or 72.4 ms before the desired initiation time. When movements were initiated 50 ms later  
189 than the third tone, the trial was aborted: the screen was blanked and a "Too Late" on-screen  
190 error signal appeared. Similarly, when movements were initiated more than 100 ms before the  
191 desired initiation time, the trial was aborted: the screen was blanked and a "Too Soon" on-screen  
192 error signal appeared. No visual feedback about movements was available when trials were

## PREPARATION TIME CONSTRAINTS CAN ASSAY IMPLICIT VISUOMOTOR

### ADAPTATION

8

193 aborted. Thus, all movements recorded and analysed were made according to the following “hard  
194 cut-off” times: within 1022.4, 272.4, 222.4, 172.4, 122.4 ms after target presentation.



## PREPARATION TIME CONSTRAINTS CAN ASSAY IMPLICIT VISUOMOTOR ADAPTATION

9

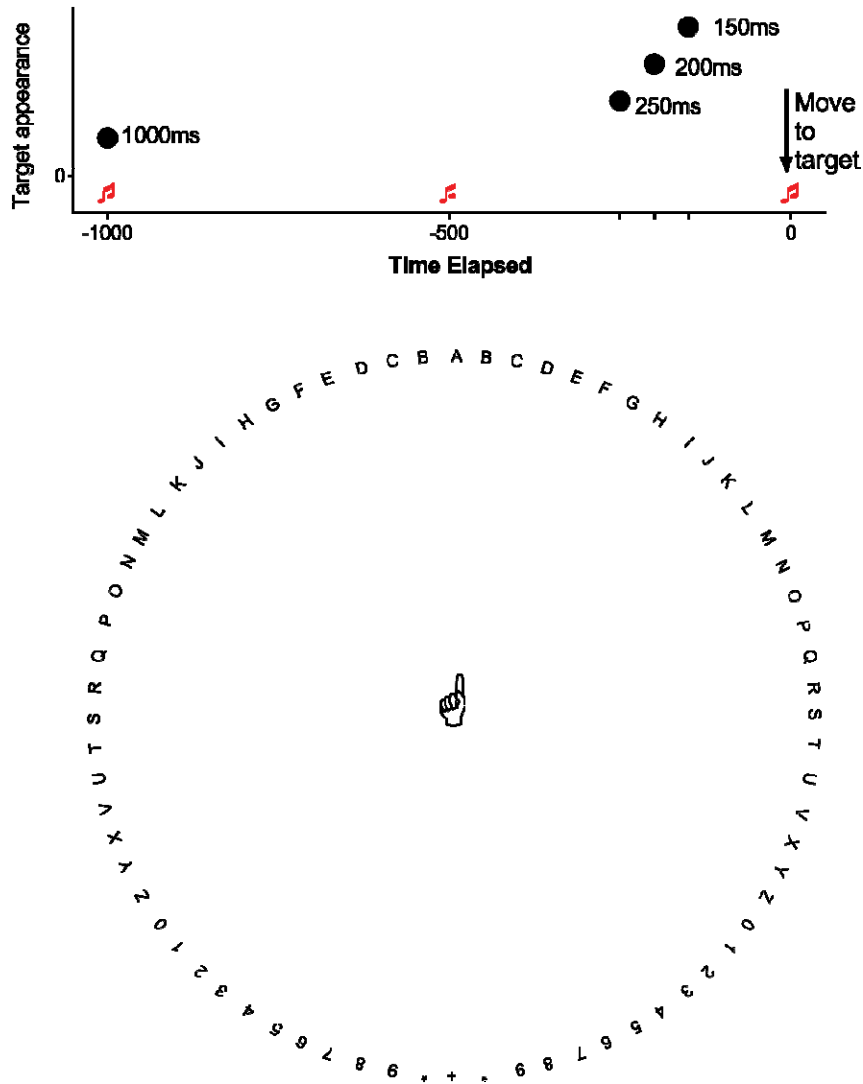

195

196 Figure 1. Top panel: A schematic representing the timed-response paradigm. Three tones spaced  
197 500 ms apart were presented, and participants were instructed to time the onset of their  
198 movements with the onset of the third tone. Targets appeared at different latencies prior to the  
199 third tone (Experiment 1a: 1000ms, 250ms, 200ms, 150ms, or 100ms; Experiment 1b: 1000ms,  
200 250ms, 200ms, 150ms; Experiment 2: Long preparation time condition: 1000ms, short  
201 preparation time condition: 250ms). Note that these latencies were minus a display latency of  
202  $27.6 \pm 1.8$  ms. Bottom panel: Experiment 2 landmark layout for the LongReport conditions.

## PREPARATION TIME CONSTRAINTS CAN ASSAY IMPLICIT VISUOMOTOR ADAPTATION

10

203           **Experiment 1.** The aim was to test re-aiming performance under progressively shorter  
204 preparation times, to determine whether restricting movement preparation can prevent strategic  
205 re-aiming. This paradigm of asking participants to re-aim by a specified angle relative to a visual  
206 target is similar to that used by Georgopoulos and Massey (1987a). In each trial, participants  
207 encountered one of eight targets which either spanned a small range of 35° (-17.5°, -  
208 12.5°...17.5°) in Experiment 1A, or a distribution of 360° (0°, 45° ... 360°) in Experiment 1B.  
209 Targets were presented in random order. In all trials, thirty-six “landmarks” were presented on-  
210 screen as white circles spaced 10° apart throughout the 360° range, 10 cm from the start circle. In  
211 the re-aiming condition, half of the participants were instructed to re-aim to the third landmark  
212 located clockwise from the target, and half were instructed to re-aim to the third landmark  
213 counter-clockwise to the target (i.e., 30° either side of the target). All participants completed the  
214 aiming condition before the re-aiming condition in blocks of 48 trials for each preparation time  
215 condition. The preparation times were progressively shortened, such that the trial schedule was:  
216 1000ms aiming, 1000ms re-aiming, 250ms aiming, 250ms re-aiming, 200ms aiming, 200ms re-  
217 aiming, 150ms aiming, 150ms re-aiming, 100ms aiming, 100ms re-aiming. The 100ms condition  
218 was not included in Experiment 1B because most participants could not initiate target-directed  
219 movements prior to the deadline.

220           **Experiment 2.** To examine whether shortening preparation time can provide a sufficient  
221 assay of implicit learning, we compared adaptation behaviour with short preparation time to an  
222 estimate of implicit learning obtained by subtracting self-reported aiming direction from the  
223 actual direction of hand movement (Bond and Taylor 2015; Brudner et al. 2016; McDougle et al.  
224 2015; Taylor et al. 2014). Participants were assigned either to a 250ms preparation time  
225 condition (Short), or one of two 1000ms preparation time conditions. In the LongReport  
226 condition, they had to verbally report aiming directions by stating which of 72 landmarks spaced  
227 5° apart most closely corresponded to the direction that they were aiming towards (Bond and  
228 Taylor 2015; Taylor et al. 2014). Previous studies exclusively used numerical landmarks (Bond  
229 and Taylor 2015; Brudner et al. 2016; Morehead et al. 2015; Taylor et al. 2014), which allowed  
230 the use of mental addition or subtraction strategies in some participants (Bond and Taylor 2015).  
231 We thus avoided using only number landmarks. Landmarks consisted of the letters A to Z, the  
232 numbers 1-9, and the symbol “\*” (reported as “star”). For ease of reporting, multiple-syllable

## PREPARATION TIME CONSTRAINTS CAN ASSAY IMPLICIT VISUOMOTOR ADAPTATION

11

233 characters (i.e., W) were not used. Landmarks rotated with the target, such that the same  
234 landmarks would always appear in the same location relative to the target, because rotating  
235 landmarks are more sensitive to explicit processes than fixed-location landmarks (Bond and  
236 Taylor 2015). Because of this, only a subset of the possible landmark values (A, B...G, \*, 1,  
237 2, ...9) were actually used by participants when reporting their aiming directions. Participants  
238 were allowed to report their aiming direction at any time between target appearance and  
239 movement completion. Verbal reports of aiming directions were recorded online by the  
240 experimenter. To estimate implicit learning, these self-reported aiming directions were  
241 subtracted from actual movement directions. A third control group (LongNoReport) had a  
242 1000ms preparation time, but did not have to report aiming directions. We did not apply the  
243 reporting manipulation to the Short condition, as piloting showed that it was extremely difficult  
244 to report the aiming direction when the target appeared 250 ms prior to the imperative signal to  
245 move.

246         Prior to the start of the experiment, participants were given no information about the  
247 nature of the rotation; they were only told that a disturbance of the cursor would be present in  
248 some trials, which may increase task difficulty. Participants in all conditions first completed a  
249 **pre-rotation** block of 6 cycles (48 trials) with veridical feedback of their movement trajectories  
250 to familiarize them with the task. LongReport participants began to verbally report their aiming  
251 direction in last 24 trials in the pre-rotation block to familiarize them with the reporting  
252 procedure. The pre-rotation block was followed by a **rotation** block (60 cycles, i.e., 480 trials)  
253 with either a 30° clockwise or counterclockwise rotation of visual feedback relative to the centre  
254 of the start circle. Halfway through this block, participants were given a 30 second break. The  
255 rotation block was followed by a **no-feedback** block of 6 cycles (i.e., 48 trials), where visual  
256 feedback of the cursor position was hidden immediately after the cursor left the start circle.  
257 Crucially, before commencing this block, participants were explicitly instructed that there was no  
258 longer any disturbance of visual feedback, and that they should aim straight towards the target  
259 (Heuer and Hegele 2008; Taylor et al. 2014). The no-feedback block therefore provides an  
260 alternative assay of implicit remapping. Finally, participants completed a **washout** block of 6  
261 cycles (48 trials) where unrotated visual feedback was available to enable participants to return  
262 movements back to the unadapted state. Landmarks were removed from the no-feedback block

## PREPARATION TIME CONSTRAINTS CAN ASSAY IMPLICIT VISUOMOTOR ADAPTATION

12

263 and the washout block, and participants were no longer required to report aiming direction in  
264 these blocks. The same preparation time constraints were maintained throughout the entire  
265 experiment for each group.

### 266 **Data analysis**

267 Movement onset time was taken as the time at which hand speed first exceeded 2 cm/s.  
268 Movement direction was quantified 100ms after movement onset, prior to the potential influence  
269 of online corrections. For Experiment 2, data from the counterclockwise rotation group were  
270 sign-transformed to allow us to collapse the dataset with data from the clockwise rotation group.  
271 Negatively signed angles indicate that the deviation in hand direction relative to the target was  
272 opposite to the direction of the rotation (i.e., to reduce visual error).

273 **Experiment 1:** To determine which of the preparation times was sufficiently short to  
274 suppress strategic re-aiming, we first quantified movement directions relative to the target as  
275 mean vectors and variability of movement directions as mean vector lengths, denoted as  $r$  for all  
276 preparation times tested using circular statistics. In the aiming condition, mean vectors values  
277 close to zero suggest that movement directions were close to the target. In the re-aiming  
278 condition, values close to  $30^\circ$  indicate that movement directions were close to the instructed re-  
279 aiming direction. Longer mean vectors indicate less variable movement directions, with a value  
280 of 1 indicating all directions aligned, and a value of 0 indicating an absence of directional tuning  
281 (i.e. a uniform distribution throughout all possible directions). We then compared movement  
282 directions and variability for the aiming conditions to the re-aiming conditions. When directional  
283 data is normally distributed, one can use the Hotelling's Paired Test, which is the equivalent of  
284 the paired t-test for circular statistics (Zar 2010). However, as aiming directions were not  
285 normally distributed, we used a non-parametric alternative (Moore's paired sample second order  
286 tests) to determine whether mean vectors differed reliably between aiming and re-aiming  
287 conditions (Zar 2010). Similarly, mean vector lengths typically show skewed distributions close  
288 to 1, and thus Wilcoxon-Rank analyses were used to compare variability between the aiming and  
289 re-aiming conditions. Circular statistics analyses were conducted with the software Oriana. For  
290 Experiment 1a (narrow target distribution), we also tested whether participants re-aimed by  
291 moving towards the middle of a (hypothetical) re-aiming target distribution by measuring the  
292 errors made to each target, for the two shortest preparation time conditions (100 ms & 150 ms).

## PREPARATION TIME CONSTRAINTS CAN ASSAY IMPLICIT VISUOMOTOR ADAPTATION

13

293 If re-aiming errors were smallest at the central 0° target and largest at the surrounding targets,  
294 then this would suggest that participants adopted a strategy to re-aim to the middle of the  
295 hypothetical re-aiming target distribution by initiating movements prior to full integration of  
296 target direction information.

297 **Experiment 2.** Prior to statistical analyses, movements further than 90° clockwise or  
298 counterclockwise away from the target (i.e., outside of a 180° range) were deemed as outliers,  
299 and were discarded from the analysis. This procedure excluded a small proportion of trials  
300 (Short: 4.00%, LongReport: 0.58%, LongNoReport: 0.39%). We evaluated whether the direction  
301 of hand movement relative to the target, under reduced movement preparation time conditions,  
302 was similar to the estimate of implicit learning obtained by subtracting self-reported aiming  
303 directions from actual movement directions (Taylor et al. 2014). To this end, we recoded verbal  
304 reports of landmarks into angular aiming directions, and then estimated implicit learning by  
305 subtracting reported aiming directions from actual movement directions. Trials were averaged in  
306 cycles of eight (one trial for each target angle) for statistical analysis. To compare adaptation  
307 behaviour between conditions, ANOVAs with the within-subjects factor Cycle and two between-  
308 subjects factors of Condition and Rotation Direction (clockwise, counterclockwise) were run on  
309 relevant cycles. For the early adaptation phase, the relevant cycles were cycles 1-30 of the  
310 adaptation block. For the late adaptation phase, the relevant cycles were cycles 31-60 of the  
311 adaptation block. For the no-feedback block, the relevant cycles were all 6 cycles of the no-  
312 feedback block. For the washout block, the relevant cycles were all 6 cycles of the washout  
313 block. For all ANOVAs, when Mauchly's test of sphericity was statistically significant, the  
314 Greenhouse-Geisser correction was used to adjust degrees of freedom.

315

PREPARATION TIME CONSTRAINTS CAN ASSAY IMPLICIT VISUOMOTOR  
ADAPTATION

14

316

**Results**

317 **Experiment 1: Re-aiming away from a target at very short preparation times**

318 Movement directions for all trials pooled across all subjects are shown in Figure 2 for  
319 Experiment 1A (small target range) and for Experiment 1B (large target range). With the small  
320 target range, movement directions were close to the target directions when aiming, and  
321 approximated the required 30° offset when re-aiming, even with the shortest preparation time  
322 condition of 100ms (i.e., hard initiation cut-off of 122.4ms). Rao's tests run for each participant's  
323 dataset within each preparation time condition indicated that movement directions were  
324 directionally tuned for all conditions, even for the shortest 100ms preparation time condition (all  
325  $p < .0001$ ). With the large target range, re-aiming movements were directed progressively closer to  
326 the original target (i.e., further from the instructed 30° offset) as preparation times were  
327 shortened. Rao's tests run for each participant's dataset within each preparation time condition  
328 indicated that movement directions were not directionally tuned for 5 of the 13 participants who  
329 completed the 150ms aiming condition and 10 of the 13 participants who completed the 150ms  
330 re-aiming conditions.

## PREPARATION TIME CONSTRAINTS CAN ASSAY IMPLICIT VISUOMOTOR ADAPTATION

15

331

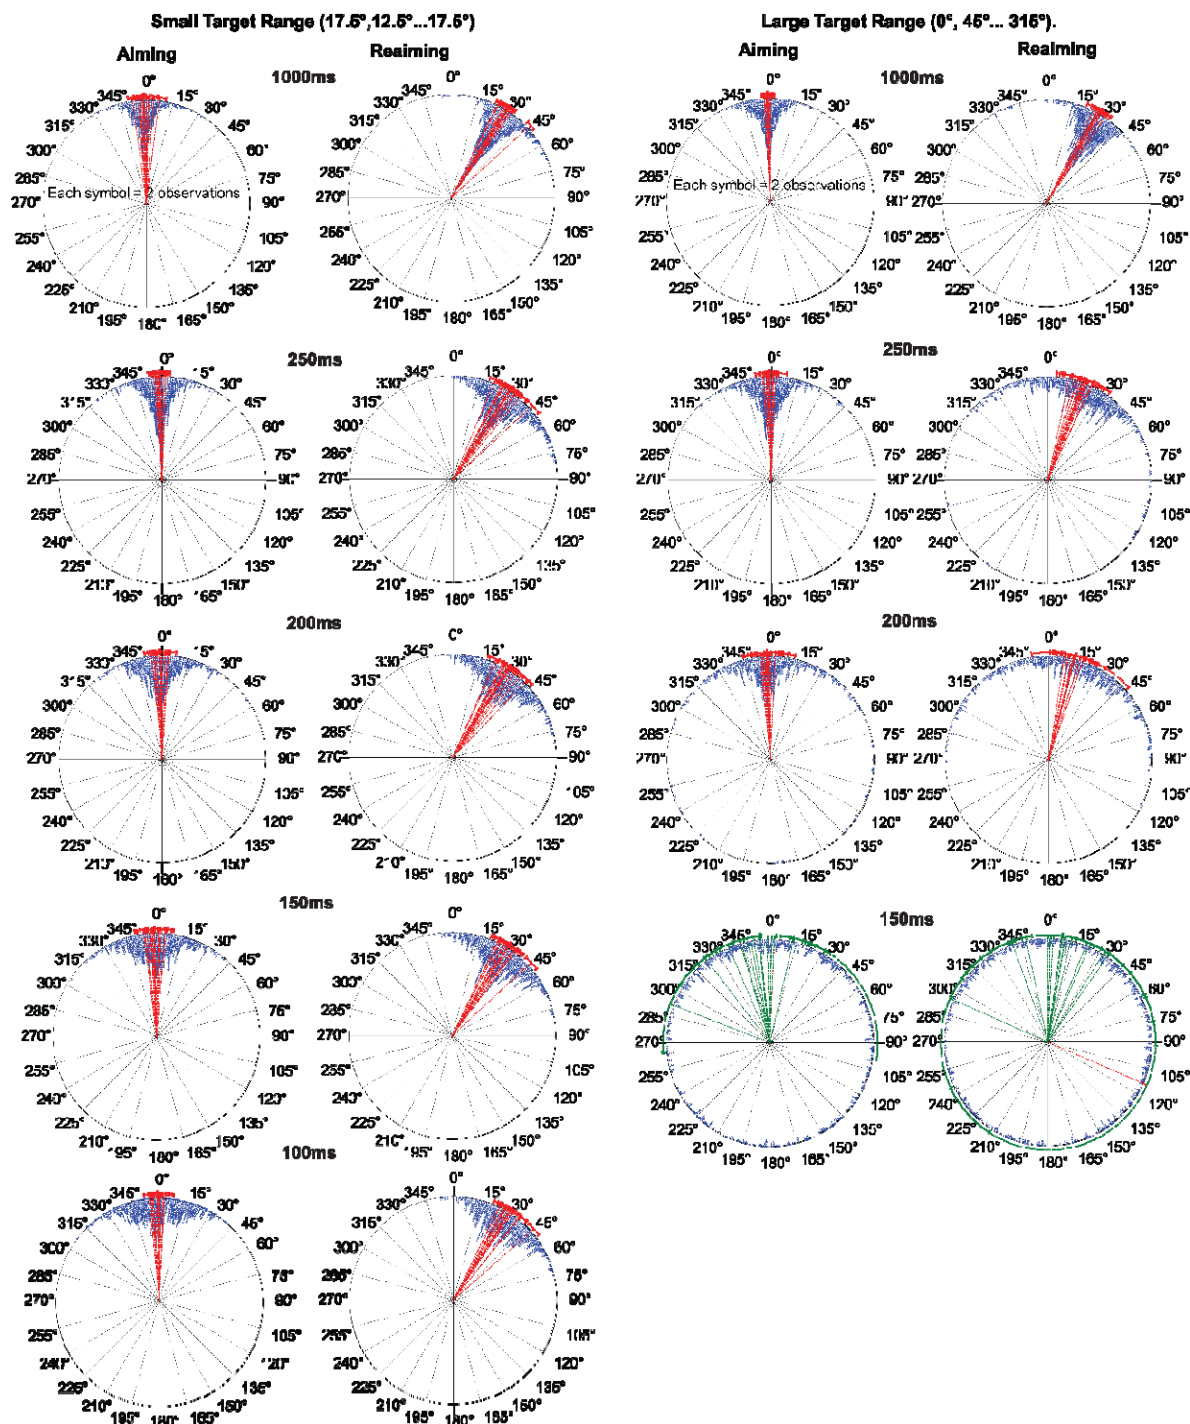

332

333 Figure 2. Movement directions for the narrow target range (-17.5° to 17.5°) and large target range (0° to 360°) plotted relative  
334 to target direction at 0°, in the aiming and re-aiming conditions. Data from participants in the counterclockwise re-aiming  
335 condition were normalized to the clockwise direction and collapsed with data from participants in the clockwise re-aiming  
336 condition. Symbols represent movement directions in individual trials for all participants across the preparation time conditions  
337 (1000ms, 250ms, 200ms, 150ms to 100 ms). Note that the hard cut-off times for movement initiation in these conditions were:

## PREPARATION TIME CONSTRAINTS CAN ASSAY IMPLICIT VISUOMOTOR

### ADAPTATION

16

338 1022.4, 272.4, 222.4, 172.4, 122.4 ms after target appearance. Red vectors represent individual mean vectors for each  
 339 participant, and error bars represent the mean and 95% confidence intervals of mean movement direction for each participant.  
 340 Green vectors represent individual mean vectors that were not significantly directionally tuned according to a Rayleigh's test.

341

342

343 Table 1.

344 Statistical analyses comparing aiming and re-aiming accuracy (assessed via mean movement  
 345 direction) and variability (assessed via vector length—longer vectors indicate less variability),  
 346 as the amount of time available to prepare movements was progressively shortened.

| <b>Movement Preparation Time</b>                      | Direction Variability (vector length)                   | Mean Vector Angle                                     | Movement Time (mean+/- SEM)                         | Direction Variability (vector length)                   | Mean Vector Angle                                     | Movement Time (mean+/-SEM)                   |
|-------------------------------------------------------|---------------------------------------------------------|-------------------------------------------------------|-----------------------------------------------------|---------------------------------------------------------|-------------------------------------------------------|----------------------------------------------|
| <b>Exp. 1A: Small target range: -17.5 ° to 17.5 °</b> |                                                         |                                                       | <b>Exp. 1B: Large target range: 0, 45°,... 315°</b> |                                                         |                                                       |                                              |
| 1000 ms                                               | Aiming: 0.99<br>Re-aiming: 0.99<br>z = -.32, p = 0.759  | Aiming: 358.5°<br>Re-aiming: 32.3°<br>2.00, p < 0.001 | Aiming: 268+/- 18 ms<br>Re-aiming: 262+/-22 ms      | Aiming: 0.99<br>Re-aiming: 0.98<br>z = -2.98, p = 0.003 | Aiming: 358.3°<br>Re-aiming: 30.1°<br>1.48, p < 0.01  | Aiming: 352+/- 19ms<br>Re-aiming: 322+/-14ms |
| 250 ms                                                | Aiming: 0.99<br>Re-aiming: 0.97<br>z = -3.21, p = 0.001 | Aiming: 358.2°<br>Re-aiming: 32.6°<br>2.00, p < 0.001 | Aiming: 262+/- 20ms<br>Re-aiming: 278+/-16 ms       | Aiming: 0.97<br>Re-aiming: 0.88<br>z = -3.41, p = 0.001 | Aiming: 358.4°<br>Re-aiming: 20.1°<br>1.97, p < 0.01  | Aiming: 235+/- 18ms<br>Re-aiming: 250+/-22ms |
| 200 ms                                                | Aiming: 0.98<br>Re-aiming: 0.97<br>z = -2.52, p = 0.012 | Aiming: 358.4°<br>Re-aiming: 32.2°<br>2.00, p < 0.001 | Aiming 261+/- 18 ms<br>Re-aiming= 253+/-16 ms       | Aiming: 0.89<br>Re-aiming: 0.66<br>z = -3.35, p = 0.001 | Aiming: 357.8°<br>Re-aiming: 14.6°<br>1.81, p < 0.01  | Aiming: 218+/- 17ms<br>Re-aiming: 233+/-17ms |
| 150 ms                                                | Aiming: 0.97<br>Re-aiming: 0.96<br>z = -.79, p = 0.432  | Aiming: 358.8°<br>Re-aiming: 32.2°<br>1.99, p < 0.001 | Aiming: 260+/- 15 ms<br>Re-aiming: 251+/-14 ms      | Aiming: 0.46<br>Re-aiming: 0.27<br>z = 3.11, p = 0.002  | Aiming: 354.3°<br>Re-aiming: 351.9°<br>1.54, p < 0.01 | Aiming: 236+/- 18<br>Re-aiming: 235+/-18     |
| 100ms                                                 | Aiming: 0.97<br>Re-aiming: 0.96<br>z = -2.61, p = 0.009 | Aiming: 358.5°<br>Re-aiming: 32.4°<br>2.00, p < 0.001 | Aiming: 262+/-18 ms,<br>Re-aiming: 258+/-16 ms      | n/a                                                     | n/a                                                   | n/a                                          |

347



## PREPARATION TIME CONSTRAINTS CAN ASSAY IMPLICIT VISUOMOTOR ADAPTATION

17

348 Table 1 summarizes statistical comparisons between aiming and re-aiming across  
349 preparation times for both the narrow target distribution (Experiment 1A) and the full 360° target  
350 distribution (Experiment 1b). For both target distributions, movement directions were more  
351 variable (shorter vector lengths) when re-aiming away from the target than when aiming to the  
352 target across all preparation times. When errors were averaged across all targets in the narrow  
353 range (Experiment 1a), it appears that participants could re-aim away from the target in all  
354 preparation times tested (even when movements were initiated within 122.4 ms of target  
355 preparation). That is, mean vector angles were on average approximately 30° away from the  
356 target across all preparation times tested. We were surprised at this apparent success in re-  
357 aiming, since Haith et al (2016) showed that directionally tuned movements to a unique target  
358 require approximately 130 ms, and the process of re-aiming (and preparing movements to a  
359 direction offset by 30° to the target) should require at least some additional processing (Haith et  
360 al. 2016). We therefore examined errors for each target in the distribution individually, to search  
361 for evidence that participants might have been able to achieve task success by aiming toward the  
362 middle of the re-aiming target distribution (i.e. 30° away from the central visual target  
363 distribution). In this case, movement could be initiated prior to integration of target direction  
364 information, but average errors collapsed across targets would be close to zero.

365 Figure 3 shows clear evidence that subjects adopted such a strategy for the shortest  
366 preparation time condition, under both aiming and re-aiming conditions. Errors were similar for  
367 all targets in the 150ms preparation time condition, indicating that there were no large inherent  
368 biases in reaching performance. There were no statistically significant differences in error size  
369 across targets ( $F(7,91) = 1.10$ ,  $p = 0.39$ , partial  $\eta$ -squared = 0.08) or conditions ( $F(1,13) = 1.1$ ,  $p$   
370 = 0.3, partial  $\eta$ -squared = 0.08), nor an interaction between target and condition ( $F(7,91) = 1.2$ ,  $p$   
371 = 0.3, partial  $\eta$ -squared = 0.09). By contrast, with 100ms preparation time (122.4 ms hard cut-  
372 off), errors were systematically larger in absolute terms as the angle from the centre of the  
373 distribution increased for the aiming condition (main effect of target  $F(7,91) = 199$ ,  $p < 0.001$ ,  
374 partial  $\eta$ -squared = 0.94). The signs of errors indicate that participants made reaching movements  
375 that were biased towards the central target. The pattern of errors for aiming and re-aiming  
376 conditions were similar for the aiming and re-aiming conditions, with no statistically significant  
377 main effect of condition ( $F(1,13) = 0.6$ ,  $p = 0.45$ , partial  $\eta$ -squared = 0.04) or interaction between

## PREPARATION TIME CONSTRAINTS CAN ASSAY IMPLICIT VISUOMOTOR ADAPTATION

18

378 condition and target ( $F(7,91) = 1.6$ ,  $p = 0.15$ , partial  $\eta$ -squared = 0.11). Note that errors from the  
379 required (re-aiming) target are plotted and analysed, rather than errors relative to the presented  
380 target. Critically, the similarity in error directions and magnitudes for the aiming and re-aiming  
381 conditions, across all preparation time conditions, suggests that if participants had sufficient time  
382 to aim towards the target, then they also had time to re-aim to one side of the target by a  
383 specified angle. Although this process of re-aiming must require some additional processing, our  
384 data suggest that such processing is extremely rapid, to the point that we were not able to detect a  
385 time-cost for re-aiming under the conditions of our experiment. The data also suggest that people  
386 are able to apply a re-aiming strategy to an anticipated target location when there is insufficient  
387 time to adequately process visual information related to the actual target. This indicates that the  
388 approach of restricting strategic re-aiming through preparation time constraints might be  
389 especially problematic for single or dual target paradigms.

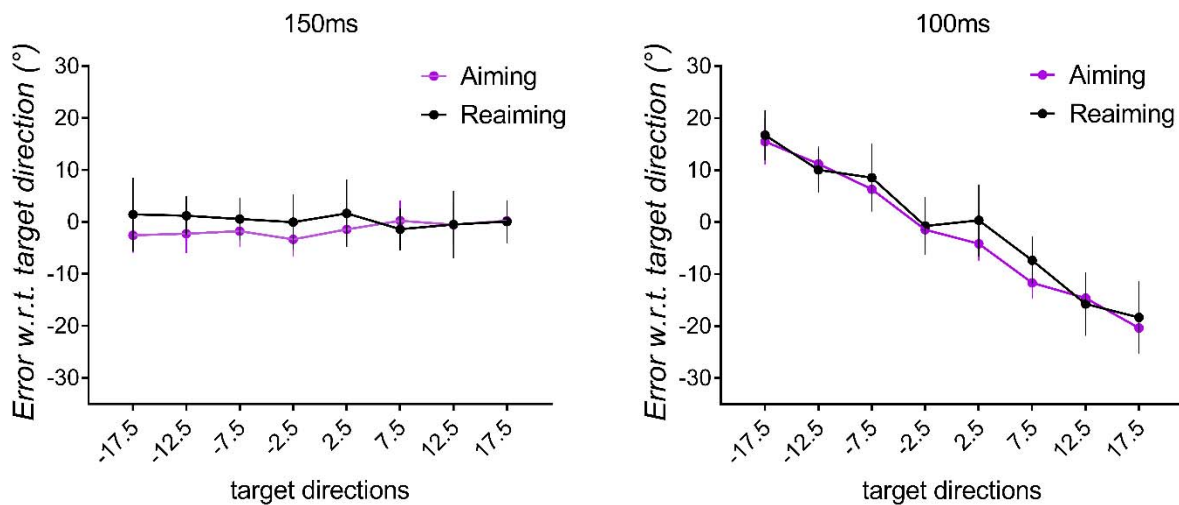

390

391 *Figure 3. Movement errors for each target direction from  $-17.5^\circ$  to  $17.5^\circ$  with respect to (w.r.t) the required*  
392 *reaching direction (i.e., presented target or re-aiming target depending on condition). Data from participants in the*  
393 *counterclockwise re-aiming condition were normalized to the clockwise direction and collapsed with data from*  
394 *participants in the clockwise re-aiming condition. Separate plots are shown for the 150ms to 100 ms preparation*  
395 *time conditions. Note that the hard cut-off times for movement initiation in these conditions were 172.4 and 122.4*  
396 *ms after target appearance. Values are group mean errors and error bars represent 95% confidence intervals.*

397 In Experiment 1b, which involved the broad target distribution, participants were less  
398 accurate at re-aiming away from the target ( $20.1^\circ$ ) with 250ms preparation, although re-aiming  
399 away from the target was still possible with 200 ms ( $14.6^\circ$ ) and 150ms ( $7.7^\circ$ ) preparation. This

## PREPARATION TIME CONSTRAINTS CAN ASSAY IMPLICIT VISUOMOTOR ADAPTATION

19

400 confirms that voluntary re-aiming is not absolutely prevented by shortening movement  
401 preparation time, irrespective of whether potential targets lie within a narrow or large angular  
402 range. Self-reports from our participants indicated, however, that re-aiming was extremely  
403 effortful at short preparation times, especially when targets were distributed around the circle.  
404 Moreover, the accuracy cost of re-aiming was dramatically greater when targets were distributed  
405 around the circle. Given this, in Experiment 2, we considered whether participants would choose  
406 to re-aim under time pressure in order to improve performance in a visuomotor rotation task. For  
407 this experiment, targets were radially arranged throughout the circle ( $0^\circ$ ,  $45^\circ$ ... $315^\circ$ ) and  
408 movement preparation time was restricted to 250ms. We decided to use 250ms as an arbitrary  
409 trade-off between a sufficient time to allow accurate aiming to the presented target, and  
410 sufficient time-pressure to make re-aiming effortful.

411

PREPARATION TIME CONSTRAINTS CAN ASSAY IMPLICIT VISUOMOTOR  
ADAPTATION

20

412 **Experiment 2: Suppressing strategic re-aiming with short preparation time constraints**  
413 **reduces the rate and extent of error compensation.**

414 Figure 4 shows the group mean, cycle-averaged, movement directions across different  
415 phases of the experiment. To evaluate whether the discrepancy between the measures of implicit  
416 learning (i.e., implicit learning estimated from subtracting aiming directions from movement  
417 directions and implicit learning estimated from the no-feedback trials) is related to the process of  
418 reporting explicit aiming angles or the preparation time constraints, we compared this data to 10  
419 additional task-naïve participants (5 counterclockwise, 5 clockwise) who completed the  
420 visuomotor rotation task with the same 1000ms preparation time constraints via the same timed-  
421 response paradigm, but who did not report aiming directions and had no visual landmarks  
422 throughout the task (LongNoReport). In the baseline block (i.e., before encountering the  
423 perturbation) a counterclockwise bias was evident in the Long preparation time group, as Cycle  
424 (Cycle 1...6) x Condition (Long, Short, LongNoReport) x Rotation Direction (clockwise,  
425 counterclockwise) ANOVA revealed a significant main effect of Condition,  $F(2,30) = 4.267$ ,  $p =$   
426  $0.023$ , partial  $\eta$ -squared = 0.221. To estimate the bias, we averaged mean movement directions  
427 from baseline cycles 2-6 (baseline cycle 1 was not included as participants were still  
428 familiarising themselves with the vBOT at this stage). To eliminate the influence of this bias on  
429 the subsequent test phases, we subtracted the bias from mean movement directions from each  
430 subsequent cycle (i.e., the first cycle of the adaptation block to the last washout cycle). The  
431 adaptation phase was arbitrarily separated into Early (Cycle 1-30) and Late blocks (Cycle 31-60).  
432 ANOVAs were run on each block for all three conditions (LongReport, Short, LongNoReport),  
433 according to a mixed within-between effects model (Cycle x Rotation Direction x Condition  
434 [LongReport, Short, LongNoReport]). In the Early phase, there was a significant main effect of  
435 Condition,  $F(2,30) = 6.25$ ,  $p = 0.005$ , partial  $\eta$ -squared = 0.294, as well as a significant Cycles x  
436 Condition interaction,  $F(24.6,370.2) = 1.59$ ,  $p = 0.037$ , partial  $\eta$ -squared = 0.09, as less error  
437 compensation was evident with Short ( $-17.3 \pm 1.3^\circ$ ) compared to LongReport, ( $-22.4 \pm 1.3^\circ$ ,  
438  $p = .033$ ) and compared to LongNoReport ( $-24.4 \pm 1.8^\circ$ ,  $p = .009$ ). Error compensation in this early  
439 phase did not differ reliably between LongReport and LongNoReport ( $p = .75$ ). Similarly, for the  
440 Late phase, there was a significant main effect of Condition,  $F(2,30) = 4.77$ ,  $p = 0.016$ , partial  $\eta$ -  
441 squared = 0.241; as less error compensation was evident with short preparation time ( $-23.1 \pm$

## PREPARATION TIME CONSTRAINTS CAN ASSAY IMPLICIT VISUOMOTOR

### ADAPTATION

21

442 1.1°) compared to LongNoReport (-28.7+/-1°,  $p = .007$ ) and compared to LongReport (-26.7+/-  
443 1.1°,  $p = .036$ ). Error compensation was also more complete for clockwise than counterclockwise  
444 rotations, as evident in significant main effect of Rotation across all phases: Early:  $F(1,30) =$   
445 21.643,  $p < 0.001$ , partial  $\eta$ -squared = 0.419, Late:  $F(1,30) = 10.96$ ,  $p = 0.002$ , partial  $\eta$ -squared  
446 = 0.268]. There were no other significant interactions.

### 447 **Preparation time constraint as an assay of implicit learning**

448 The implicit component of error compensation observed for the Long preparation group  
449 was estimated by subtracting the participants' reported aiming direction from their actual  
450 movement direction, similar to previous work (Bond and Taylor 2015; Brudner et al. 2016;  
451 McDougale et al. 2015; Taylor et al. 2014). This measure of error is hereafter termed  
452 "LongImplicit", and was compared to angular errors observed between the target and movement  
453 for the short preparation time condition. There were no significant differences between  
454 LongImplicit and Short, as shown by Condition (LongImplicit, Short) x Cycle (Cycle 1...30) x  
455 Rotation Direction (CW, CCW) ANOVAs run for the early adaptation phase [main effect of  
456 Condition,  $F(1,24) = 1.33$ ,  $p = 0.26$ , partial  $\eta$ -squared = 0.05, Cycle x Condition  $F(12.6,303.9) =$   
457 1.05,  $p = 0.4$ , partial  $\eta$ -squared = 0.04 interaction], as well as the late adaptation phase  
458 [Condition,  $F(1,24) = 1.44$ ,  $p = 0.2$ , partial  $\eta$ -squared = 0.06, Cycles x Condition,  $F(11.9,287.1)$   
459 = 1.4,  $p = 0.16$ , partial  $\eta$ -squared = 0.05]. The main effect of rotation direction was statistically  
460 significant for the early adaptation phase,  $F(1,24) = 26.29$ ,  $p < 0.001$ , partial  $\eta$ -squared = 0.52 as  
461 well as for the late adaptation phase:  $F(1,24) = 11.473$ ,  $p = 0.002$ , partial  $\eta$ -squared = 0.32. There  
462 were no significant interactions. Thus, the extent and rate of implicit learning did not differ  
463 reliably between estimates based on subtracting self-reported aiming directions and restriction of  
464 preparation time.

## PREPARATION TIME CONSTRAINTS CAN ASSAY IMPLICIT VISUOMOTOR ADAPTATION

22

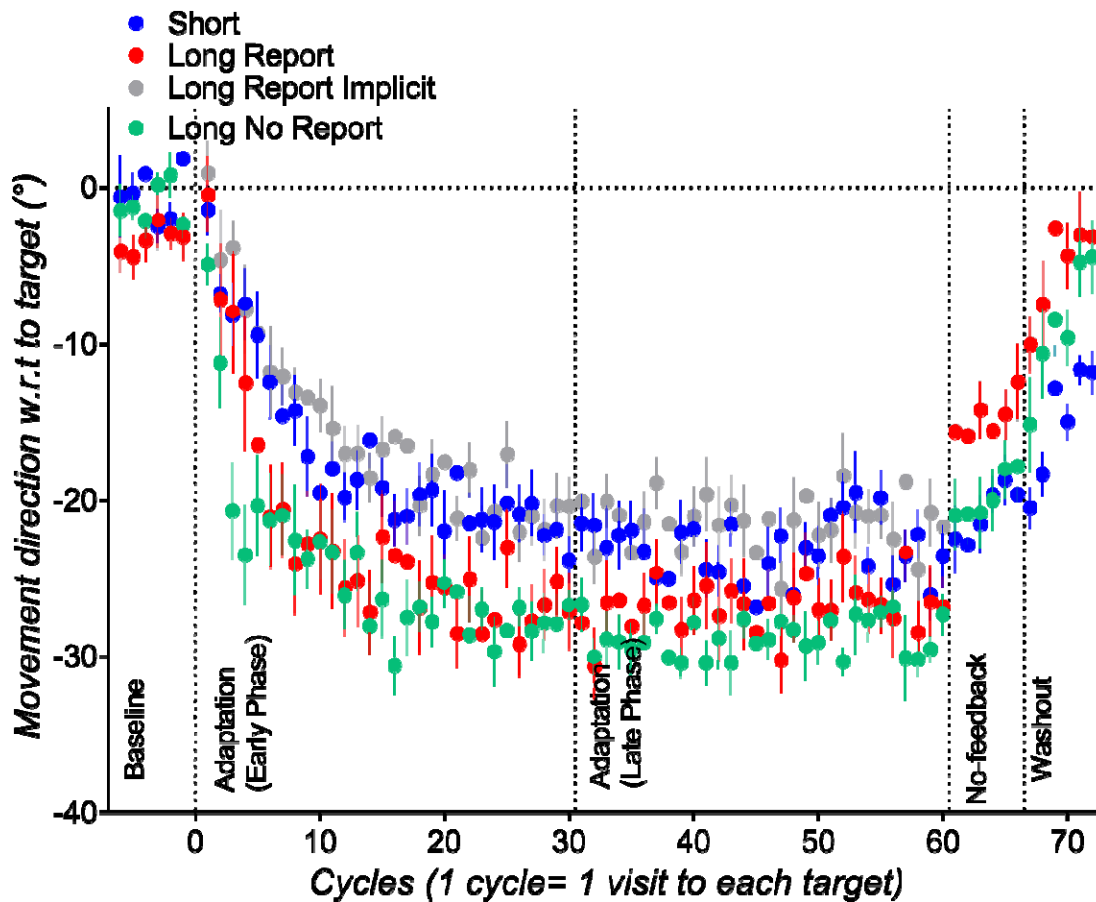

465

466 *Figure 4. Experiment 2 mean movement direction in every cycle, averaged across each condition. Data*  
467 *from participants who encountered counterclockwise rotations were sign-transformed to allow collapsing*  
468 *with data from participants who encountered clockwise rotations. Error bars are standard errors of the*  
469 *mean. Negative values indicate movements that were opposite from the direction of rotation, positive*  
470 *values indicate movements that were in the same direction as the rotation. Note that Long Report Implicit*  
471 *is not an additional experimental condition, but is derived from subtracting self-reported aiming*  
472 *directions from movement directions in the Long Report condition.*

473

### 474 **Difference in estimate of implicit learning from subtracting aiming directions and estimate** 475 **of implicit learning from no-feedback trials**

476 An alternative measure of implicit remapping is provided by the no-feedback trials that  
477 participants performed after the final adaptation phase block. Here, participants received no  
478 visual feedback about their movements, and were explicitly instructed that the perturbation was  
479 removed and that they should aim straight to the target (Taylor et al. 2014), (similar to Heuer and  
480 Hegele 2015). For the LongReport group (Figure 3) the measure of implicit learning obtained

## PREPARATION TIME CONSTRAINTS CAN ASSAY IMPLICIT VISUOMOTOR

### ADAPTATION

23

481 from this no-feedback block appears substantially lower (i.e., movements were less adapted) than  
482 the measure of implicit learning obtained by subtraction of reported aiming direction in the last  
483 adaptation cycle. In contrast, for the Short group, errors in the last adaptation cycle were similar  
484 to those in the first no-feedback cycle. To compare implicit learning (estimated by subtracting  
485 aiming direction or by shortening preparation times) to implicit learning estimated by no-  
486 feedback trials, we compared the last adaptation cycle (after subtracting aiming directions for the  
487 LongReport group) to the first no-feedback cycle for the LongReport group and the Short group,  
488 via a Condition (LongReport, Short) x Rotation Direction (CW, CCW) x Phase (last adaptation  
489 cycle, first no-feedback phase cycle) ANOVA. There was a significant Phase x Condition  
490 interaction,  $F(1, 24) = 4.36$ ,  $p = .047$ , partial eta-squared = .15. Follow-up Rotation Direction x  
491 Phase (last adaptation cycle, first no-feedback phase cycle) ANOVAs were run separately for the  
492 LongReport and the Short condition. For LongReport, implicit learning estimated by subtracting  
493 aiming direction in the last adaptation cycle ( $21.7 \pm 1.8^\circ$ ) was more than implicit learning  
494 estimated in the first no-feedback cycle ( $15.8 \pm 1.6^\circ$ ), as shown by a significant main effect of  
495 phase  $F(1, 12) = 6.94$ ,  $p = 0.022$ , partial  $\eta$ -squared = 0.37. In contrast, for the short preparation  
496 time, the last adaptation cycle ( $-23.5 \pm 1.8^\circ$ ) did not differ reliably from the first no-feedback  
497 cycle ( $-22.5 \pm 1.9^\circ$ ): the main effect of Phase was not significant ( $F(1, 12) = 0.33$ ,  $p = 0.57$ ,  
498 partial  $\eta$ -squared = 0.02), and did not interact significantly with any other factor. Thus, for the  
499 LongReport group, there was a discrepancy between the estimates of implicit learning provided  
500 by the reporting method, obtained in the presence of the rotation, and the no-feedback condition,  
501 obtained after the final movement performed under the visuomotor rotation. There was no  
502 discrepancy between implicit learning estimates for the short preparation time group, even  
503 though the final estimate of implicit learning at the end of adaptation was similar to that obtained  
504 after subtracting aiming directions for LongReport group, and despite the fact that both groups  
505 had explicit knowledge that the rotation was removed.

506 This discrepancy between the estimates of implicit learning from reporting, in the last  
507 adaptation cycle, and from no-feedback trials in which participants were instructed that the  
508 rotation was absent, was also evident in previous work using the reporting procedure (c.f. Fig 2C,  
509 Fig 5C Bond and Taylor 2015). Taylor et al. (2014) attributed the effect to trial-by-trial decay of  
510 adaptation within the first no-feedback cycle, because there was no statistically significant

## PREPARATION TIME CONSTRAINTS CAN ASSAY IMPLICIT VISUOMOTOR ADAPTATION

24

511 difference between the last adaptation trial and the first no-feedback trial (Taylor et al. 2014).  
512 Our LongReport group similarly showed no reliable difference in estimated implicit learning  
513 from the last adaptation trial to the first no-feedback trial (Trial x Rotation Direction ANOVA on  
514 the LongReport group showed a non-significant main effect of Trial  $F(1,12)=.30$ ,  $p =.59$ , partial  
515 eta-squared =.03). However, we hesitate to make inferences from this non-significant effect,  
516 because comparing trial-by-trial data in multi-target designs can be problematic: target directions  
517 were likely to differ between the last adaptation trial and the first no-feedback trial between-  
518 subjects, and directional accuracy differs between targets (Gordon et al. 1994). Moreover,  
519 movements were also less adapted on average over all six no-feedback cycles for the LongReport  
520 than the Short group, as shown by a significant main effect of Condition,  $F(1,24) = 6.91$ ,  $p =$   
521  $0.01$ , partial  $\eta$ -squared = 0.22 in a Condition x Rotation Direction x Cycle ANOVA. This  
522 suggests that the extent or persistence of implicit learning was less for the long preparation with  
523 reporting condition than the short preparation condition.

524 To evaluate whether the discrepancy between measures of implicit learning is related to  
525 the reporting procedure (i.e., the process of reporting explicit aiming angles and/or the presence  
526 of visual landmarks), we compared error compensation data from the Long Report group to the  
527 LongNoReport group. Error compensation during exposure to the rotation did not differ reliably  
528 between this LongNoReport group and the LongReport group, as Cycle x Reporting  
529 (LongNoReport, LongReport) x Rotation Direction (CW, CCW) ANOVAs run separately for the  
530 early adaptation phase (Cycles 1...31) and the late adaptation phase (Cycles 31...60) showed a  
531 non-significant main effect of reporting for the early adaptation phase [ $F(1,18) = 0.67$ ,  $p = 0.424$ ,  
532 partial  $\eta$ -squared = 0.036], and no significant interactions, as well as for the late adaptation phase,  
533  $F(1,18) = 0.843$ ,  $p = 0.371$ , partial  $\eta$ -squared = 0.045, no significant interactions]. However, the  
534 estimate of implicit learning obtained from no-feedback trials was greater for the LongNoReport  
535 group than the LongReport condition: Cycle (Cycle 1-6) x Reporting (LongNoReport,  
536 LongReport) x Rotation Direction (CW, CCW) ANOVA on the no-feedback block showed a  
537 significant main effect of reporting,  $F(1,18) = 7.32$ ,  $p = 0.015$ , partial  $\eta$ -squared = 0.289. There  
538 were no other significant interactions. The main effect of Rotation Direction was significant  
539  $F(1,18) = 16.64$ ,  $p = 0.001$ , partial  $\eta$ -squared = 0.48—similar to the adaptation phase,  
540 movements were more adapted with the clockwise direction ( $-21.0\pm 1.0^\circ$ ) than the



## PREPARATION TIME CONSTRAINTS CAN ASSAY IMPLICIT VISUOMOTOR ADAPTATION

25

541 counterclockwise direction ( $13.4 \pm 1.0^\circ$ ). Performance in the no-feedback trials did not differ  
542 significantly between the LongNoReport and the Short group—a Cycle (Cycle 1-6) x Condition  
543 (LongNoReport, Short) x Rotation Direction ANOVA showed a non-significant main effect of  
544 condition [ $F(1,18) = 0.449$ ,  $p = 0.511$ , partial  $\eta$ -squared = 0.024], and no significant interactions  
545 with condition, all  $p > 0.5$ . The main effect of rotation direction was significant  $F(1,18) = 15.98$ ,  
546  $p = 0.001$ , partial  $\eta$ -squared = 0.47.

547

### Discussion

548 This study aimed to evaluate a previously established method of assaying implicit  
549 learning by restricting the time available to prepare movement (Fernandez-Ruiz et al. 2011;  
550 Haith et al. 2015). Experiment 1 showed that restricting time available to prepare movements  
551 does not prevent people from applying a deliberate strategy to re-aim to one side of a target,  
552 particularly when targets are distributed within a narrow angular range. However, Experiment 2  
553 showed that restricting movement preparation time effectively reduces strategic re-aiming during  
554 adaptation to visuomotor rotation when targets are distributed throughout  $360^\circ$ , as shown by  
555 slower and less complete error compensation compared to when movement preparation times  
556 were not shortened. Moreover, the errors made by participants when preparation time was  
557 shortened were indistinguishable from an assay of implicit learning obtained by subtracting self-  
558 reported aiming directions from movement directions (Bond and Taylor 2015; Brudner et al.  
559 2016; McDougle et al. 2015; Taylor et al. 2014). Surprisingly, despite this similarity in estimates  
560 of implicit learning obtained for the two methods during exposure to the visuomotor rotation,  
561 participants who reported aiming directions showed less implicit remapping in the post-  
562 perturbation no-feedback trials than those who did not report aiming directions. This suggests  
563 that the process of reporting aiming direction reduces the extent or persistence of implicit  
564 learning.

### 565 Suppressing the expression of explicit learning by restricting preparation time

566 Despite a long history of studies on implicit and explicit processes in sensorimotor  
567 adaptation (Jakobson and Goodale 1989; Uhlarik 1973), our understanding of how these  
568 processes interact to determine behaviour remains incomplete. Here, we further evaluated the  
569 method of assaying implicit learning by restricting movement preparation time (Fernandez-Ruiz

## PREPARATION TIME CONSTRAINTS CAN ASSAY IMPLICIT VISUOMOTOR ADAPTATION

26

570 et al. 2011; Haith et al. 2015). We showed that when there is intention to re-aim (i.e., when  
571 participants were explicitly instructed to re-aim) and potential targets were distributed within a  
572 small ( $35^\circ$ ) range, accurate re-aiming is possible irrespective of the time between target  
573 presentation and movement initiation. The accuracy cost of re-aiming in such conditions was  
574 modest. Moreover, for the shortest preparation time condition (movement initiation constrained  
575 to occur within 123 ms of target presentation), it appears that participants initiated movement  
576 prior to complete integration of visual information about the actual target, and were able to  
577 achieve task success by aiming or re-aiming to the centre of the (required) target distribution.  
578 When target direction (and thus re-aiming direction) was less predictable (targets distributed  
579 throughout  $0-360^\circ$ ), however, re-aiming accuracy declined with progressively shorter preparation  
580 times. Participants were still able to partially re-aim away from the target whenever they had  
581 sufficient time to produce directionally tuned movements, but at the expense of dramatically  
582 increased movement variability. Hence, compressing preparation time does not introduce an  
583 absolute limit upon the capacity for re-aiming, particularly for narrow target distributions.

584         However, during sensorimotor adaptation to a perturbation, restricting preparation time  
585 appeared to suppress re-aiming when targets were distributed about  $360^\circ$ , such that error  
586 compensation was indistinguishable from the assay of implicit learning obtained from  
587 subtracting reported aiming direction from actual movement direction. This suggests that people  
588 choose not to apply re-aiming strategies to correct for visuomotor perturbations under time  
589 pressure, presumably to avoid the increases in effort and variability associated with re-aiming  
590 under such conditions.

591         This interpretation prompts a formal definition of the distinction between implicit and  
592 explicit processes. Here, consistent with others (Huberdeau et al. 2015), we define explicit  
593 processes as those which can be deliberately engaged and disengaged. By contrast, implicit  
594 processes are automatic and difficult to deliberately disengage. We do not distinguish between  
595 explicit processes from implicit processes based on awareness of the perturbation or a re-aiming  
596 strategy, as classically defined (Reber 1967). Indeed, many of our participants in the short  
597 preparation time condition were able to accurately describe the nature of the rotation and could  
598 articulate a compensatory strategy, but found it simply too difficult to implement the strategy  
599 when preparation times were restrained.

## PREPARATION TIME CONSTRAINTS CAN ASSAY IMPLICIT VISUOMOTOR ADAPTATION

27

600 Our findings that asymptotic error levels were greater for short than long preparation time  
601 conditions differ from those of Haith et al. (2015). In their task, which involved two potential  
602 targets, participants were eventually able to reduce errors to a similar degree for the short and  
603 long preparation time targets. This discrepancy in findings probably relates to the predictability  
604 of the target locations. Targets only appeared in two locations in Haith et al. (2015), with  
605 preparation time of ~300 ms. However, our Experiment 1A shows that explicit re-aiming is  
606 possible even at 123 ms when the target direction was predictable within a small 35° range.  
607 Hence, although the target-switch protocol in Haith et al. (2015) appears to have restricted  
608 explicit processes initially, the method may not have been sufficient to suppress re-aiming by the  
609 end of the adaptation block.

### 610 **Discrepancy between different estimates of implicit learning.**

611 In Experiment 2, the extent of implicit learning inferred from aiming reports in the long  
612 preparation time condition was similar to the extent of error compensation observed for the short  
613 preparation time condition. However, for the long preparation condition, there was a difference  
614 between estimates of implicit learning obtained from reporting during exposure to the rotation,  
615 and estimates of implicit learning obtained from subsequent movements made without feedback.  
616 A discrepancy has been reported previously between measures of implicit learning measured via  
617 movement directions after subtracting aiming directions, and via movement directions in  
618 subsequent no-feedback trials (c.f. Fig 2C, Fig 5C Bond and Taylor 2015). However, we found  
619 that there was no such decay between errors in the last perturbation trials and first no-feedback  
620 trials for the short preparation time condition. Furthermore, the overall amount of implicit  
621 remapping (indicated by adapted movements in the no-feedback block despite explicit  
622 knowledge that the rotation had been removed), was less in the reporting group than in either of  
623 two groups that did not report aiming directions (i.e., the LongNoReport group and the Short  
624 group), irrespective of movement preparation time. We note that this difference might result  
625 from either the act of reporting aiming directions, and/or the presence of visual landmarks,  
626 however, as the original reporting procedure often requires the use of landmarks, we did not  
627 attempt to dissociate between the two possibilities.

628 We propose two possibilities to account for these observations. One possibility is that  
629 implicit learning is more labile (i.e., more sensitive to decay due to a change in task context or

## PREPARATION TIME CONSTRAINTS CAN ASSAY IMPLICIT VISUOMOTOR ADAPTATION

28

630 the passage of time) when it is acquired in a context in which people report their re-aiming  
631 strategies to compensate for errors. The proposal that explicit processes reduce the persistence of  
632 implicit remapping is consistent with findings in prism adaptation, where explicit knowledge of  
633 the nature of the perturbation reduces the extent of implicit remapping measured in post-  
634 perturbation no-feedback trials (Jakobson and Goodale 1989; Uhlarik 1973). One caveat to this  
635 interpretation is that, although all three groups experienced the same change in context (i.e., from  
636 having feedback of cursor position with visuomotor rotation to having no cursor feedback and  
637 explicit knowledge that the rotation had been removed), the LongReport group experienced an  
638 additional context change (i.e., from having to report aiming directions to no longer having to  
639 report aiming directions). Thus, we cannot rule out the possibility that the extent of context  
640 change, rather than sensitivity to change, was the key factor underlying a reduced estimate of  
641 implicit learning in the LongReport condition.

642 An alternative possibility that could explain our data is that people may have  
643 systematically under-reported their aiming angle (i.e., people re-aimed to a greater extent than  
644 they reported). This would result in an underestimation of explicit learning and an  
645 overestimation of implicit learning in the error compensation phase. In this case, the no-feedback  
646 trials would provide a more accurate measure of implicit learning than the reporting trials, which  
647 in turn would imply that the reporting procedure enhanced explicit learning and impaired  
648 implicit learning relative to non-reporting conditions. The possibility that the reporting procedure  
649 enhanced explicit re-aiming is supported by previous findings of faster error compensation with  
650 the reporting procedure than without (Taylor et al. 2014). Such a situation would suggest a  
651 competitive push-pull relationship between implicit and explicit processes in sensorimotor  
652 adaptation. A push-pull relationship between implicit and explicit processes has been shown for  
653 other motor learning tasks. For example, in sequence learning, disrupting explicit awareness of a  
654 sequence to be learned, by performing a concurrent verbal declarative task, improved post-task  
655 recall of implicitly acquired sequences (Brown and Robertson 2007). Similarly, in force-field  
656 adaptation, engaging a declarative verbal memory task resulted in poorer recall of a fragile,  
657 possibly explicit memory created by a fast process, and improved recall of a robust, possibly  
658 implicit memory created by a slow process (Keisler and Shadmehr 2010).

## PREPARATION TIME CONSTRAINTS CAN ASSAY IMPLICIT VISUOMOTOR ADAPTATION

29

659 By contrast, implicit adaptation to visuomotor rotation has been argued to be inflexible,  
660 such that it develops in parallel with, but independently from, explicit learning (Bond and Taylor  
661 2015). Although it is difficult to test whether self-reports of aiming direction are accurate,  
662 discrepancies between self-reported aiming directions and actual aiming directions seem possible.  
663 Georgopoulos and Massey (1987a) showed that when participants were explicitly instructed to  
664 re-aim by a specified angle, their re-aiming was in excess of the instructed angle, particularly  
665 with smaller instructed re-aiming angles of less than 35°. Thus, the question of whether implicit  
666 and explicit processes operate independently or competitively in visuomotor rotation learning  
667 warrants further attention.

### 668 **Summary**

669 This study evaluated the method of dissociating implicit and explicit learning by  
670 manipulating the amount of time available to prepare movements. The method has previously  
671 been shown to unmask implicit visuomotor rotation learning on a trial-by-trial basis (Haith et al.  
672 2015). We found that although shortening preparation time does not prevent people from  
673 voluntarily aiming to one side of a target, it appears sufficient to suppress strategic re-aiming  
674 during visuomotor adaptation when targets are distributed about a broad angular range.  
675 Estimating implicit learning by subtracting aiming directions from movement directions yielded  
676 a discrepancy between the estimate of implicit error compensation obtained during exposure to  
677 the perturbation, and the estimate of implicit learning obtained from post-perturbation trials  
678 without feedback. It is possible that the reporting procedure inadvertently increased explicit re-  
679 aiming and decreased implicit learning, which would suggest a push-pull relationship between  
680 explicit and implicit learning. In contrast, shortening movement preparation time did not result in  
681 a discrepancy between the estimate of implicit learning obtained from self-report during  
682 exposure to the perturbation, and the estimate of implicit learning obtained from trials performed  
683 subsequently without visual feedback.

684

PREPARATION TIME CONSTRAINTS CAN ASSAY IMPLICIT VISUOMOTOR  
ADAPTATION

30

685 *References*

- 686 **Bond KM, and Taylor JA.** Flexible explicit but rigid implicit learning in a visuomotor  
687 adaptation task. *J Neurophysiol* 113: 3836-3849, 2015.
- 688 **Brown RM, and Robertson EM.** Inducing motor skill improvements with a declarative task.  
689 *Nature neuroscience* 10: 148-149, 2007.
- 690 **Brudner SN, Kethidi N, Graeupner D, Ivry RB, and Taylor JA.** Delayed feedback during  
691 sensorimotor learning selectively disrupts adaptation, but not strategy use. *J Neurophysiol* jn  
692 00066 02015, 2016.
- 693 **Fernandez-Ruiz J, Wong W, Armstrong IT, and Flanagan JR.** Relation between reaction  
694 time and reach errors during visuomotor adaptation. *Behav Brain Res* 219: 8-14, 2011.
- 695 **Galea JM.** Secondary tasks impair adaptation to step- and gradual-visual displacements. *Exp*  
696 *Brain Res* 202: 473-484, 2010.
- 697 **Georgopoulos AP, and Massey JT.** Cognitive spatial-motor processes - 1. The making of  
698 movements at various angles from a stimulus direction. *Exp Brain Res* 65: 361-370, 1987a.
- 699 **Georgopoulos AP, and Massey JT.** Cognitive spatial-motor processes. 1. The making of  
700 movements at various angles from a stimulus direction. *Exp Brain Res* 65: 361-370, 1987b.
- 701 **Ghez C, Hening W, and Favilla M.** Gradual Specification of Response Amplitude in Human  
702 Tracking Performance. *Brain Behav Evol* 33: 69-74, 1989.
- 703 **Gordon J, Ghilardi MF, and Ghez C.** Accuracy of planar reaching movements - I.  
704 Independence of direction and extent variability. *Exp Brain Res* 99: 97-111, 1994.
- 705 **Haith AM, Huberdeau DM, and Krakauer JW.** The influence of movement preparation time  
706 on the expression of visuomotor learning and savings. *The Journal of neuroscience : the official*  
707 *journal of the Society for Neuroscience* 35: 5109-5117, 2015.
- 708 **Heuer H, and Hegele M.** Adaptation to visuomotor rotations in younger and older adults.  
709 *Psychol Aging* 23: 190-202, 2008.
- 710 **Heuer H, and Hegele M.** Explicit and implicit components of visuo-motor adaptation: An  
711 analysis of individual differences. *Consciousness and cognition* 33: 156-169, 2015.
- 712 **Howard IS, Ingram JN, and Wolpert DM.** A modular planar robotic manipulandum with end-  
713 point torque control. *Journal of Neuroscience Methods* 181: 199-211, 2009.
- 714 **Huberdeau DM, Krakauer JW, and Haith AM.** Dual-process decomposition in human  
715 sensorimotor adaptation. *Curr Opin Neurobiol* 33: 71-77, 2015.
- 716 **Jakobson LS, and Goodale MA.** Trajectories of reaches to prismatically-displaced targets:  
717 evidence for "automatic" visuomotor recalibration. *Experimental brain research* 78: 575-587,  
718 1989.
- 719 **Keisler A, and Shadmehr R.** A shared resource between declarative memory and motor  
720 memory. *Journal of Neuroscience* 30: 14817-14823, 2010.
- 721 **Malone La, and Bastian AJ.** Thinking about walking: effects of conscious correction versus  
722 distraction on locomotor adaptation. *Journal of neurophysiology* 103: 1954-1962.

## PREPARATION TIME CONSTRAINTS CAN ASSAY IMPLICIT VISUOMOTOR

### ADAPTATION

31

- 723 **Marinovic W, Cheung FL, Riek S, and Tresilian JR.** The effect of attention on the release of  
724 anticipatory timing actions. *Behav Neurosci* 128: 548, 2014.
- 725 **Marinovic W, Plooy A, and Tresilian JR.** The time course of amplitude specification in brief  
726 interceptive actions. *Exp Brain Res* 188: 275-288, 2008.
- 727 **Marinovic W, Tresilian J, Chapple JL, Riek S, and Carroll T.** Unexpected acoustic  
728 stimulation during action preparation reveals gradual re-specification of movement direction.  
729 *Neuroscience* 2017.
- 730 **Mazzoni P, and Krakauer JW.** An implicit plan overrides an explicit strategy during  
731 visuomotor adaptation. *Journal of Neuroscience* 26: 3642-3645, 2006.
- 732 **McDougle SD, Bond KM, and Taylor JA.** Explicit and implicit processes constitute the fast  
733 and slow processes of sensorimotor learning. *The Journal of Neuroscience* 35: 9568-9579, 2015.
- 734 **Morehead JR, Qasim SE, Crossley MJ, and Ivry R.** Savings upon Re-Aiming in Visuomotor  
735 Adaptation. *The Journal of neuroscience : the official journal of the Society for Neuroscience* 35:  
736 14386-14396, 2015.
- 737 **Reber AS.** Implicit learning of artificial grammars. *Journal of verbal learning and verbal*  
738 *behavior* 6: 855-863, 1967.
- 739 **Redding GM, and Wallace B.** Adaptive Spatial Alignment and Strategic Perceptual-Motor  
740 Control. 22: 1996.
- 741 **Reichenthal M, Avraham G, Karniel A, and Shmuelof L.** Target size matters: Target errors  
742 contribute to the generalization of implicit visuomotor learning. *Journal of neurophysiology* jn.  
743 00830.02015, 2016.
- 744 **Schouten JF, and Bekker JAM.** Reaction time and accuracy. *Acta Psychologica* 27: 143-153,  
745 1967.
- 746 **Taylor JA, Krakauer JW, and Ivry RB.** Explicit and implicit contributions to learning in a  
747 sensorimotor adaptation task. *The Journal of neuroscience : the official journal of the Society for*  
748 *Neuroscience* 34: 3023-3032, 2014.
- 749 **Taylor JA, and Thoroughman KA.** Divided Attention Impairs Human Motor Adaptation But  
750 Not Feedback Control. *Journal of Neurophysiology* 98: 317-326, 2007.
- 751 **Taylor JA, and Thoroughman KA.** Motor adaptation scaled by the difficulty of a secondary  
752 cognitive task. *PLoS ONE* 3: 2008.
- 753 **Uhlarik JJ.** Role of cognitive factors on adaptation to prismatic displacement. *J Exp Psychol* 98:  
754 223-232, 1973.
- 755 **Wolpert DM, Ghahramani Z, and Jordan MI.** An internal model for sensorimotor integration.  
756 *Science* 269: 1880-1882, 1995.
- 757 **Zar JH.** *Biostatistical analysis*. Upper Saddle River, N.J.: Upper Saddle River, N.J. : Prentice-  
758 Hall/Pearson, 2010.
- 759  
760

## PREPARATION TIME CONSTRAINTS CAN ASSAY IMPLICIT VISUOMOTOR

### ADAPTATION

32

#### 761 Figure Legends

762 Figure 3. Top panel: A schematic representing the timed-response paradigm. Three tones spaced  
763 500 ms apart were presented, and participants were instructed to time the onset of their  
764 movements with the onset of the third tone. Targets appeared at different latencies prior to the  
765 third tone (Experiment 1a: 1000ms, 250ms, 200ms, 150ms, or 100ms; Experiment 1b: 1000ms,  
766 250ms, 200ms, 150ms; Experiment 2: Long preparation time condition: 1000ms, short  
767 preparation time condition: 250ms). Note that these latencies were minus a display latency of  
768  $27.6 \pm 1.8$  ms. Bottom panel: Experiment 2 landmark layout for the LongReport conditions.

769  
770 Figure 4. Movement directions for the narrow target range ( $-17.5^\circ$  to  $17.5^\circ$ ) and large target  
771 range ( $0^\circ$  to  $360^\circ$ ) plotted relative to target direction at  $0^\circ$ , in the aiming and re-aiming conditions.  
772 Data from participants in the counterclockwise re-aiming condition were normalized to the  
773 clockwise direction and collapsed with data from participants in the clockwise re-aiming  
774 condition. Symbols represent movement directions in individual trials for all participants across  
775 the preparation time conditions (1000ms, 250ms, 200ms, 150ms to 100 ms). Note that the hard  
776 cut-off times for movement initiation in these conditions were: 1022.4, 272.4, 222.4, 172.4,  
777 122.4 ms after target appearance. Red vectors represent individual mean vectors for each  
778 participant, and error bars represent the mean and 95% confidence intervals of mean movement  
779 direction for each participant. Green vectors represent individual mean vectors that were not  
780 significantly directionally tuned according to a Rayleigh's test.

781  
782 Figure 3. Movement errors for each target direction from  $-17.5^\circ$  to  $17.5^\circ$  with respect to (w.r.t)  
783 the required reaching direction (i.e., presented target or re-aiming target depending on condition).  
784 Data from participants in the counterclockwise re-aiming condition were normalized to the  
785 clockwise direction and collapsed with data from participants in the clockwise re-aiming  
786 condition. Separate plots are shown for the 150ms to 100 ms preparation time conditions. Note  
787 that the hard cut-off times for movement initiation in these conditions were 172.4 and 122.4 ms  
788 after target appearance. Values are group mean errors and error bars represent 95% confidence  
789 intervals.

790  
791 Figure 4. Experiment 2 mean movement direction in every cycle, averaged across each condition.  
792 Data from participants who encountered counterclockwise rotations were sign-transformed to  
793 allow collapsing with data from participants who encountered clockwise rotations. Error bars are  
794 standard errors of the mean. Negative values indicate movements that were opposite from the  
795 direction of rotation, positive values indicate movements that were in the same direction as the  
796 rotation. Note that Long Report Implicit is not an additional experimental condition, but is  
797 derived from subtracting self-reported aiming directions from movement directions in the Long  
798 Report condition.

799  
800



Target appearance

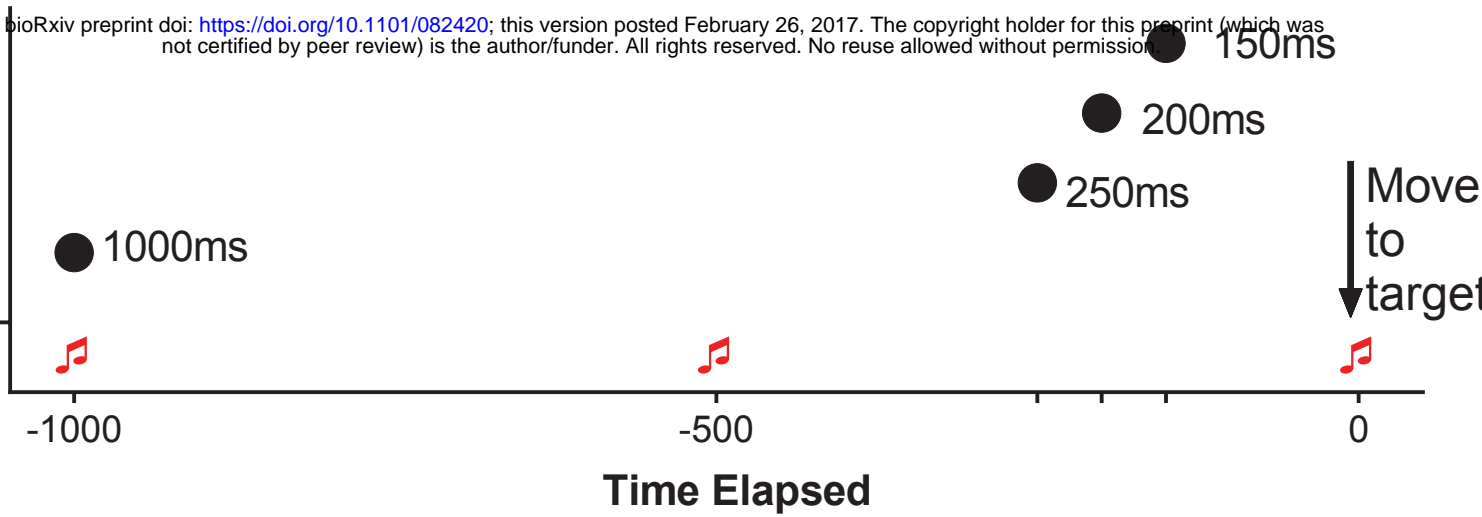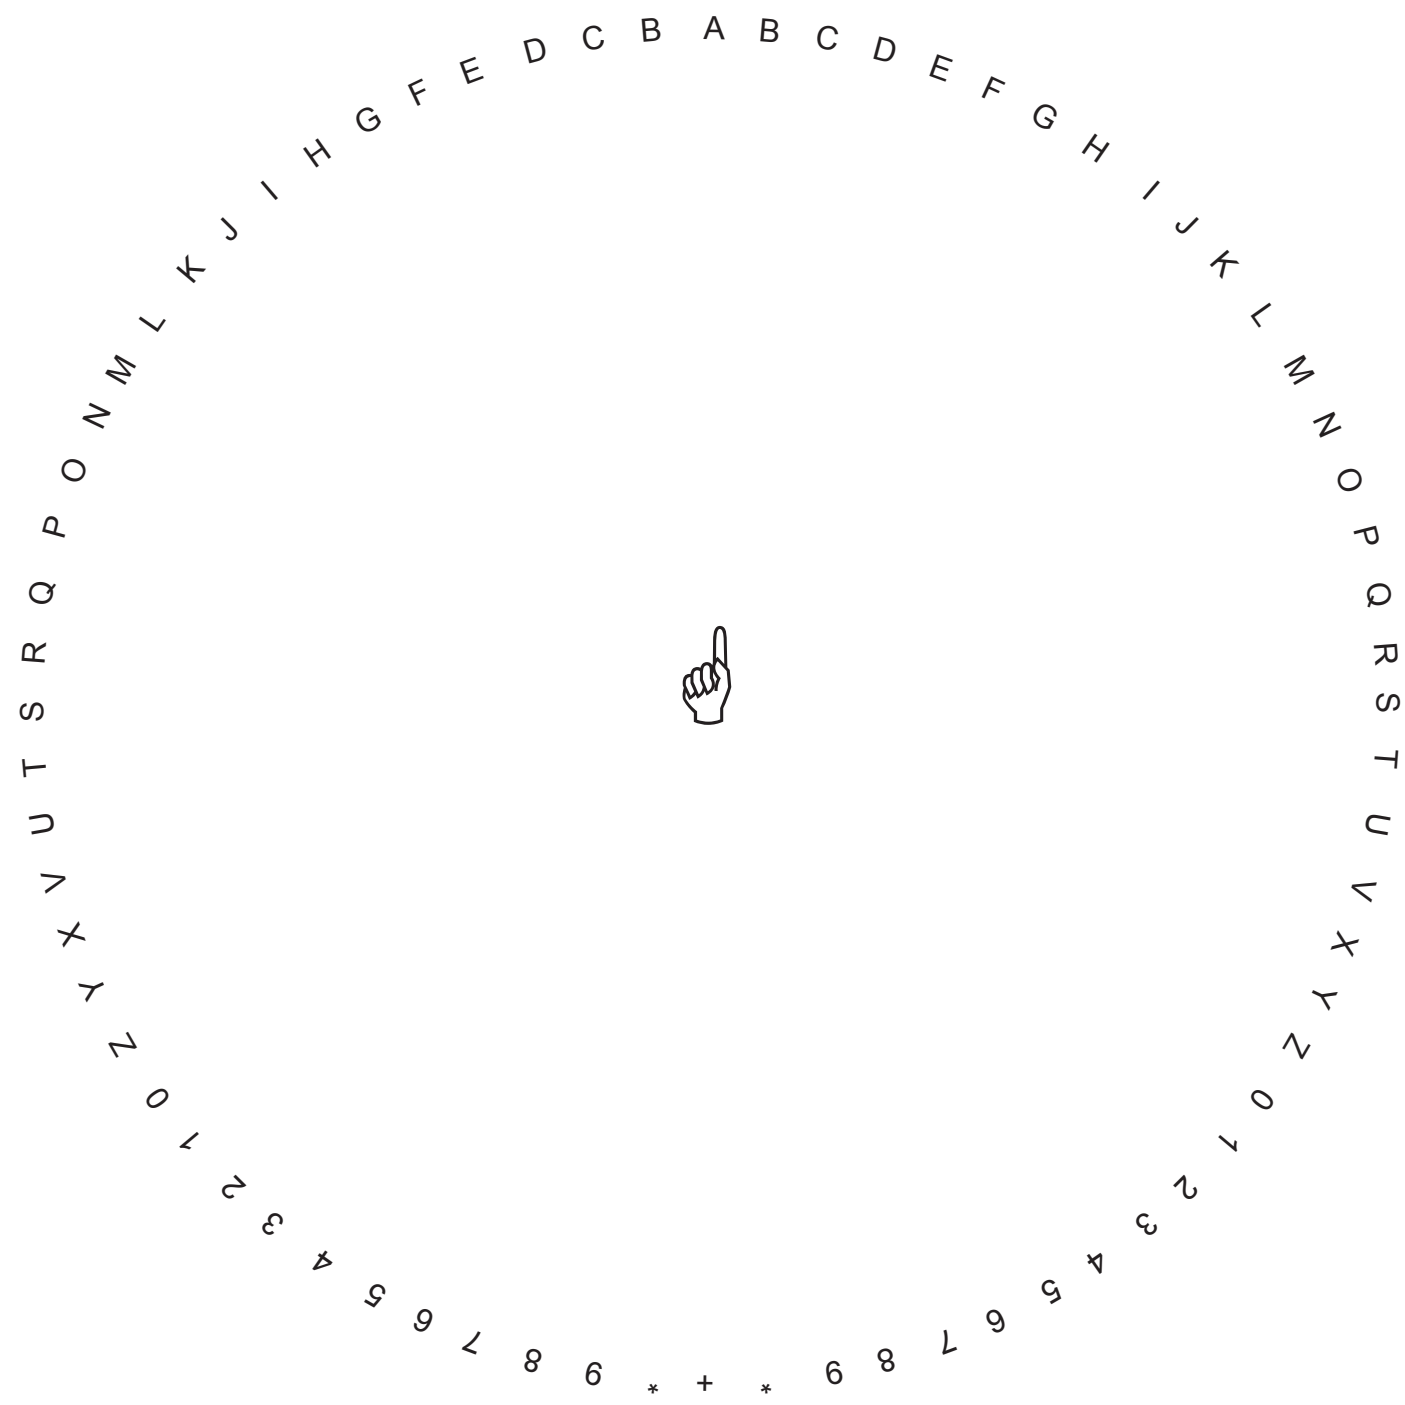

**Small Target Range (17.5°, 12.5° ... 17.5°)**

**Large Target Range (0°, 45° ... 315°)**

**Aiming**

**Reaiming**

**Aiming**

**Reaiming**

**1000ms**

**1000ms**

**250ms**

**250ms**

**200ms**

**200ms**

**150ms**

**150ms**

**100ms**

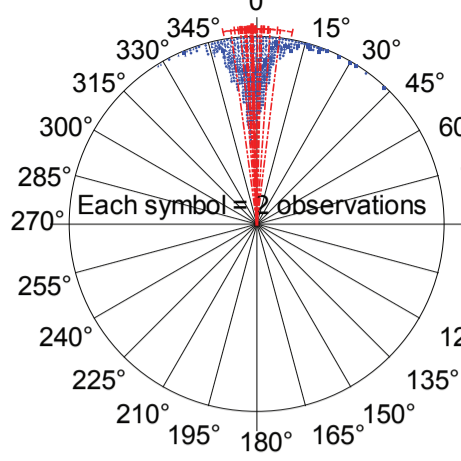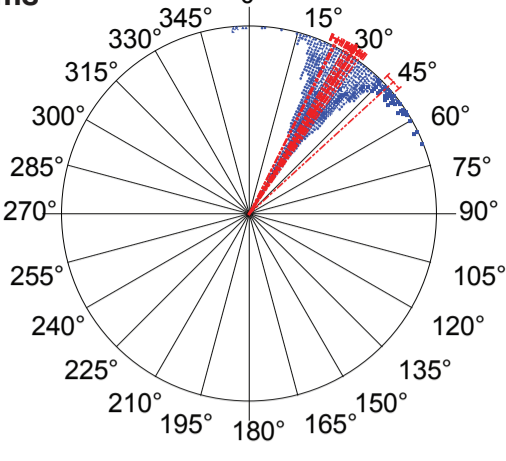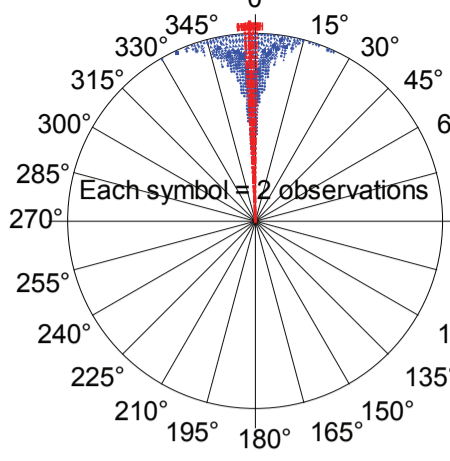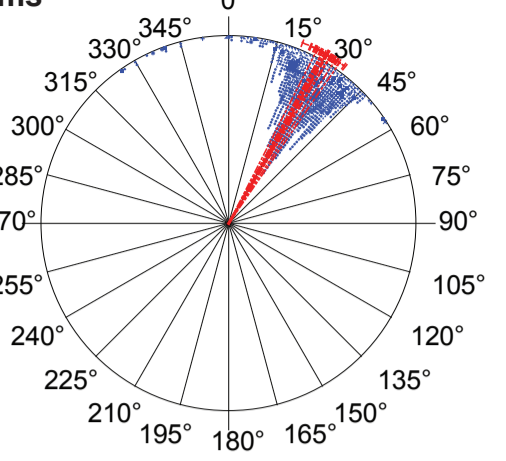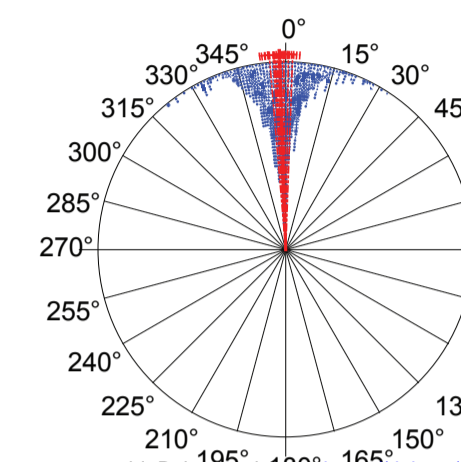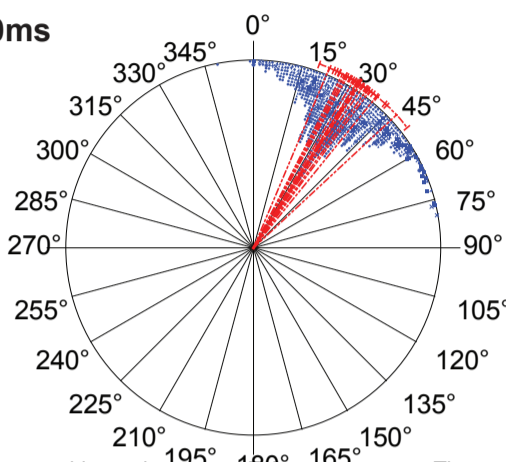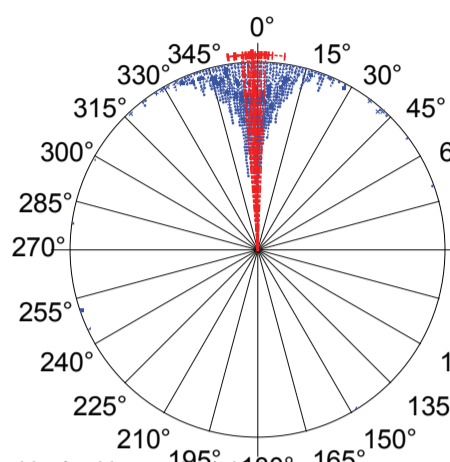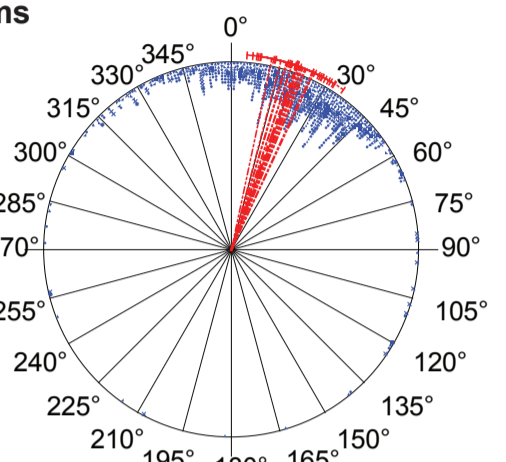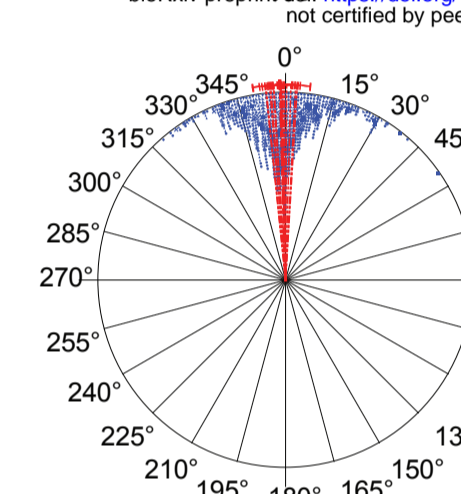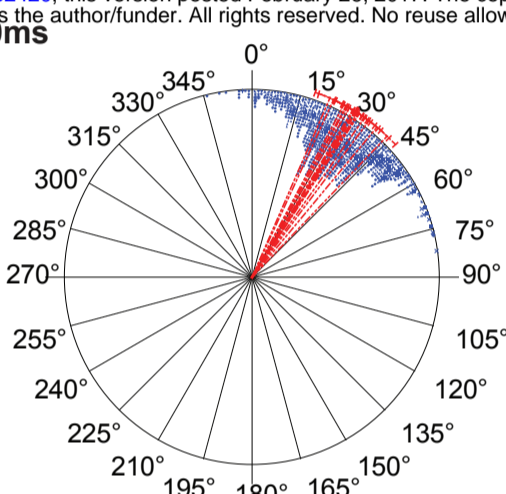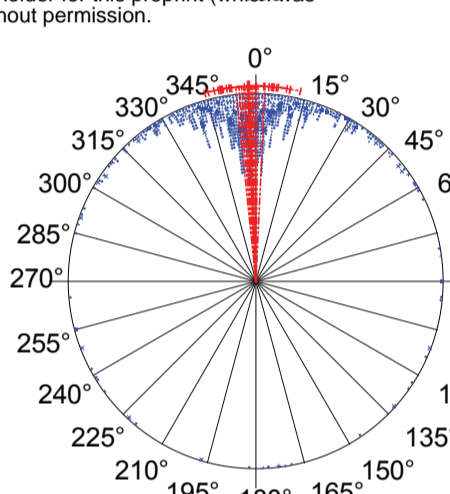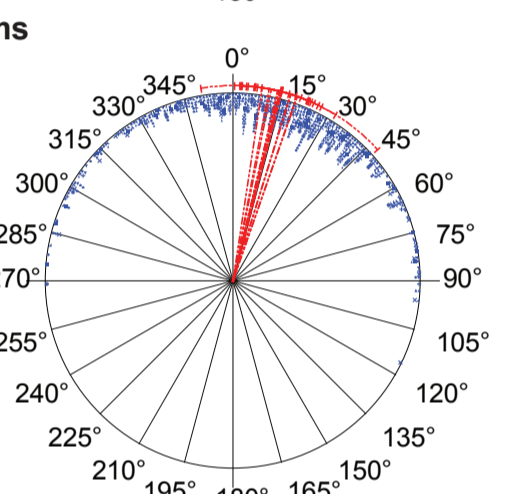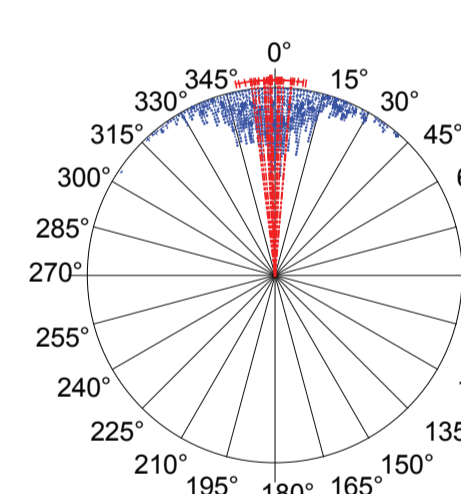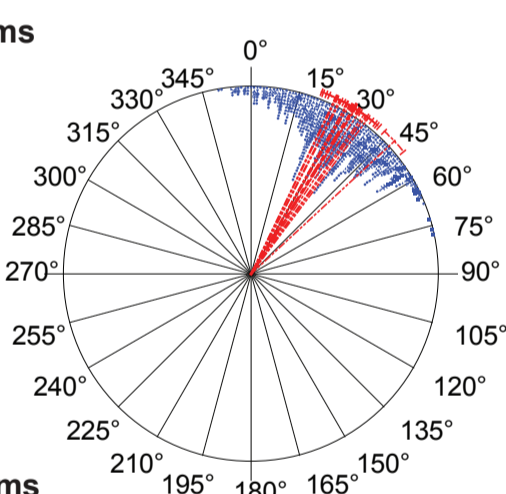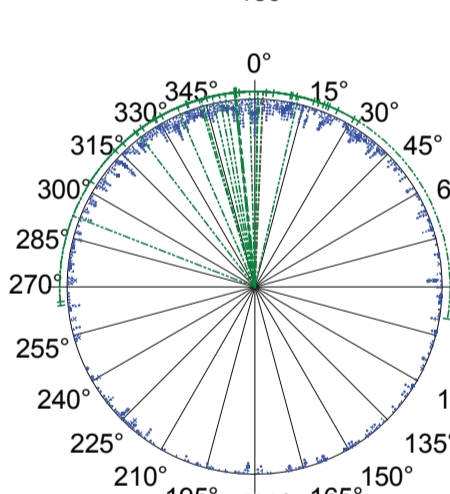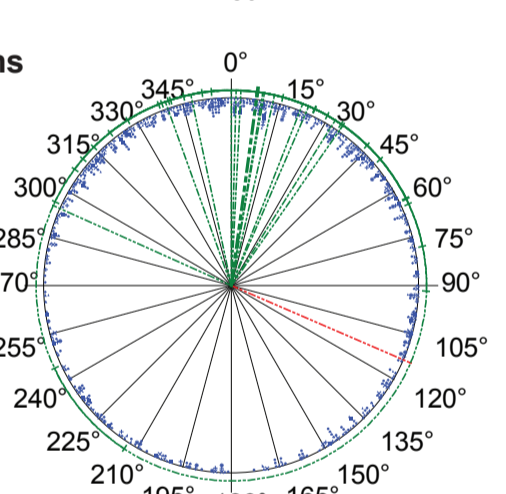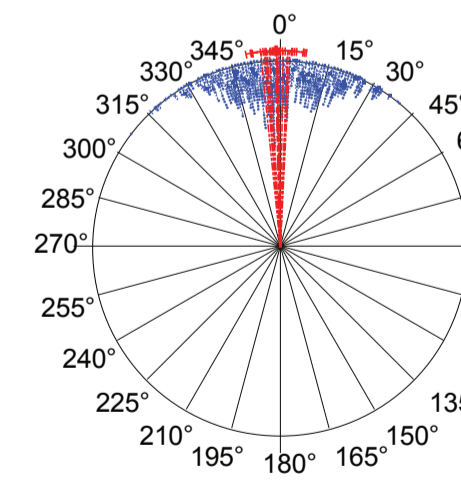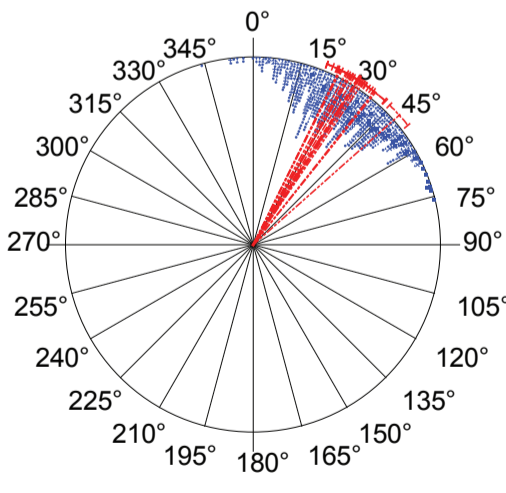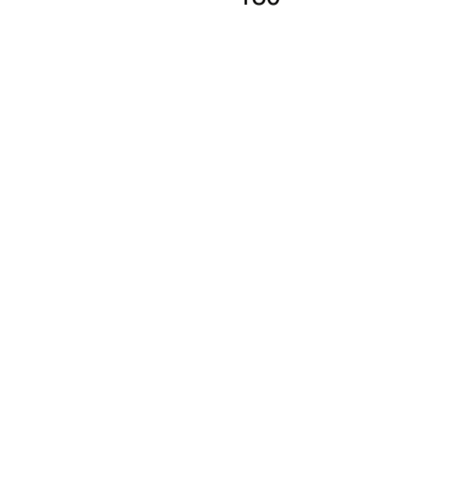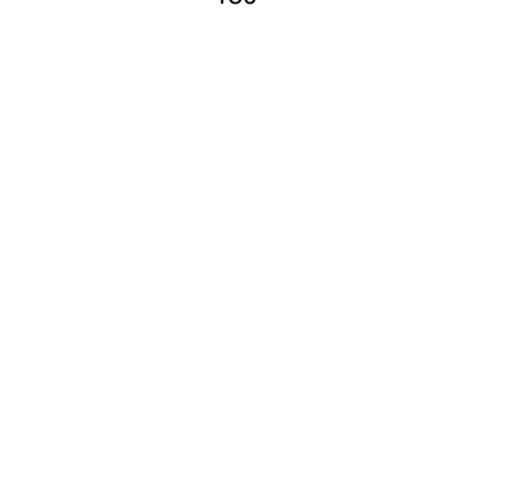

bioRxiv preprint doi: <https://doi.org/10.1101/082420>; this version posted February 26, 2017. The copyright holder for this preprint (which was not certified by peer review) is the author/funder. All rights reserved. No reuse allowed without permission.

Each symbol = 2 observations

Each symbol = 2 observations

150ms

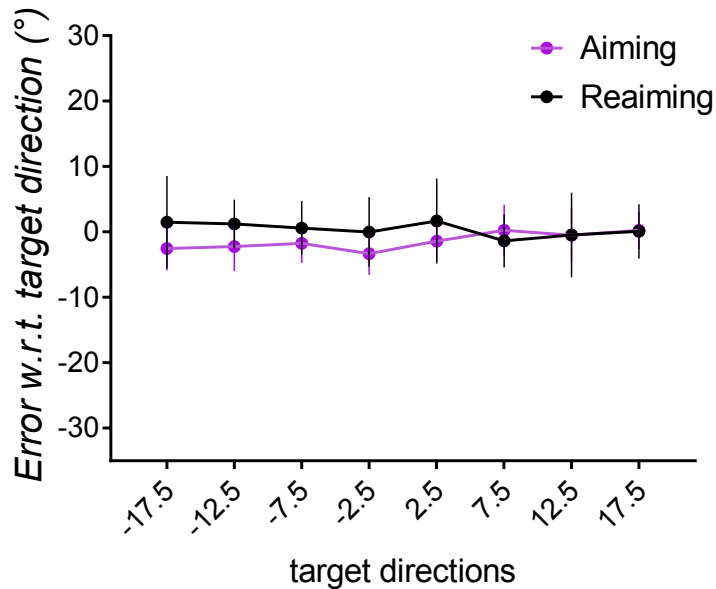

100ms

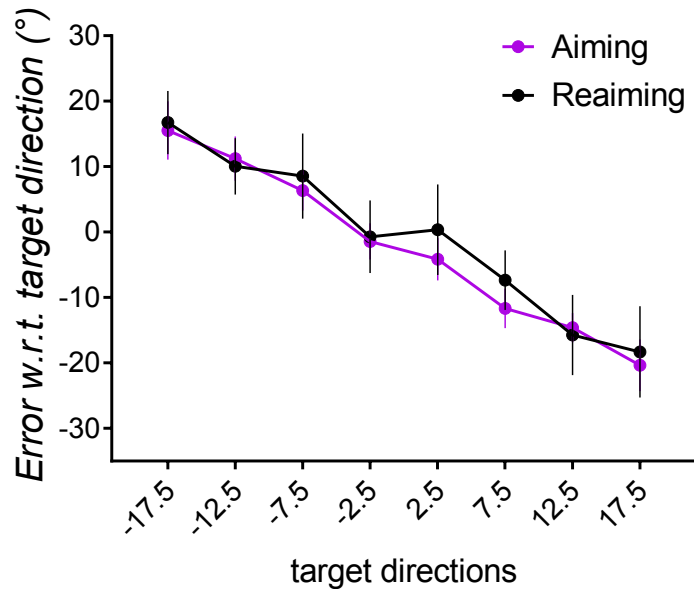

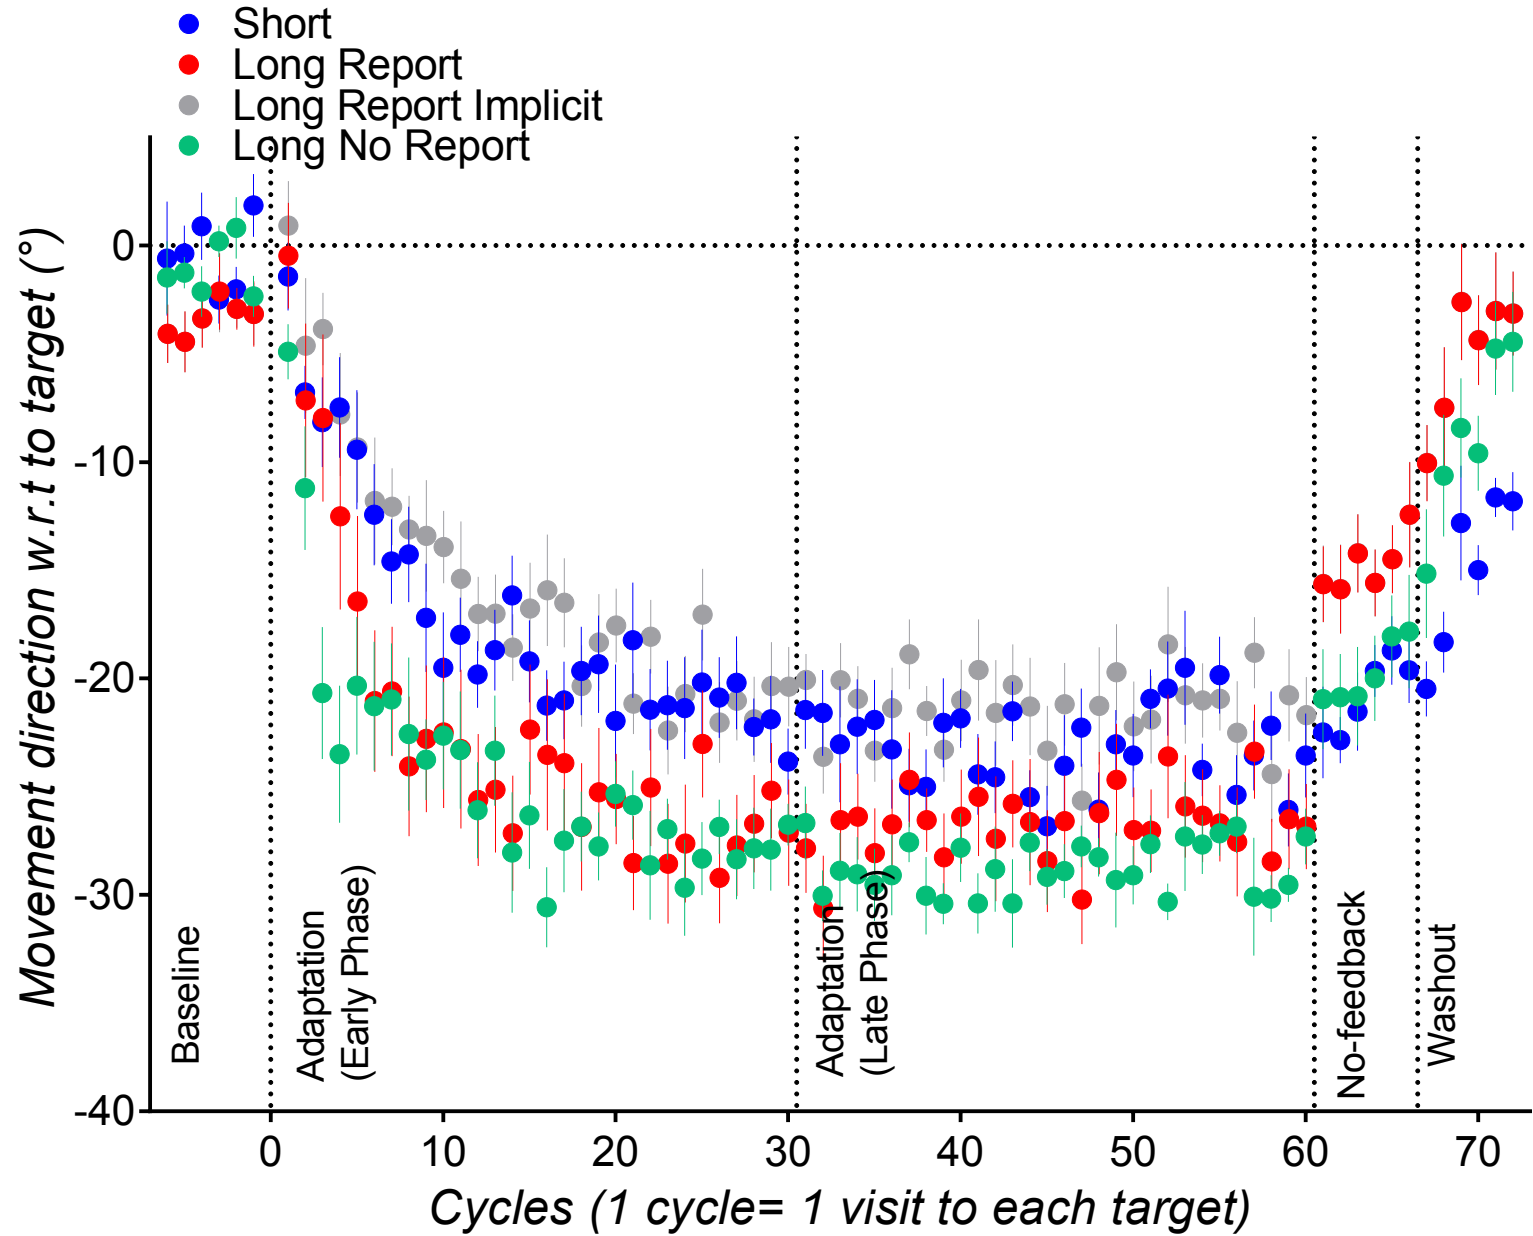

Source: http://biorxiv.org/content/10.1101/082420v2.full.pdf
